# Supplementary material for: Urea-fused and π-extended single-benzene fluorophores with ultralarge Stokes shifts
Source: Royal Society of Chemistry journal article supplement (doi:10.1039/d4cc03389b), 2024-01-01
Supplement: d4cc03389b1.pdf [file d4cc03389b1.pdf]

# Electronic Supplementary Information

## Urea-fused and $\pi$ -extended single-benzene fluorophores with ultralarge Stokes shifts

Taehyeon Choi<sup>+</sup>, Heechan Kim<sup>+</sup>, Younghun Kim<sup>+</sup>, and Dongwhan Lee\*

*Department of Chemistry, Seoul National University, 1 Gwanak-ro, Gwanak-gu, Seoul 08826, Korea*

<sup>+</sup>These authors contributed equally to this work.

### Experimental Section

**General Considerations.** All reagents were purchased from commercial suppliers and used as received unless otherwise noted. All air-sensitive manipulations were carried out under inert atmosphere by Schlenk-line techniques. All microwave-assisted synthesis was performed in a Biotage<sup>®</sup> Initiator+ microwave synthesizer. Spectroscopic grade dichloromethane, cyclohexane, toluene, EtOAc, and MeOH were used for solvent-dependent photophysical measurements. All air-sensitive manipulations were carried out under argon atmosphere by standard Schlenk-line techniques. The compounds 1,1'-(2,3-diamino-1,4-phenylene)bis(ethan-1-one) (*o*-DAPA),<sup>1</sup> 3,6-di(pyridin-2-yl)benzene-1,2-diamine,<sup>2</sup> 2,1,3-benzothiadiazole-4,7-bis(boronic acid pinacol ester) (**1**),<sup>3</sup> and 4-(4,4,5,5-tetramethyl-1,3,2-dioxaborolan-2-yl)benzo[*c*][1,2,5]thiadiazole (**5**)<sup>4</sup> were prepared according to the reported procedures.

**Physical Measurements.** <sup>1</sup>H NMR and <sup>13</sup>C NMR spectra were recorded on a 400 MHz Agilent 400-MR DD2 Magnetic Resonance System and a 500 MHz Varian/Oxford As-500 spectrometer. Chemical shifts were referenced to the residual solvent peaks for <sup>1</sup>H NMR and <sup>13</sup>C NMR spectra. FT-IR spectra were recorded on a PerkinElmer Spectrum Two FT-IR Spectrophotometer. High-resolution electrospray ionization (ESI) mass spectra were obtained on a Thermo Scientific LTQ Orbitrap XL mass spectrometer. UV-vis spectra were recorded on an Agilent 8453 UV-vis spectrophotometer with ChemStation software. Fluorescence spectra were recorded on a Photon Technology International Quanta-Master 400 spectrofluorometer with FelixGX software. Quantum yields were determined by using a 3.2-inch K-Sphere Petite integrating sphere attached to the spectrofluorometer. Single-crystal X-ray diffraction (SC-XRD) studies were carried out using Cu K $\alpha$  radiation on an XtaLAB AFC12 (RINC): Kappa dual home/near diffractometer.

<sup>1</sup> H. Kim, W. Park, Y. Kim, M. Filatov, C. H. Choi, and D. Lee, *Nat. Commun.*, 2021, **62**, 5409.

<sup>2</sup> I. Pochorovski, J. Milić, D. Kolarski, C. Gropp, W. B. Schweizer and F. Diederich, *J. Am. Chem. Soc.*, 2014, **136**, 3852–3858.

<sup>3</sup> H. Wang, G. Zhou, H. Gai and X. Chen, *Chem. Commun.*, 2012, **48**, 8341–8343.

<sup>4</sup> Z. Ni, H. Wang, H. Dong, Y. Dang, Q. Zhao, X. Zhang and W. Hu, *Nat. Chem.*, 2019, **11**, 271–277.

**Computational Studies.** All density functional theory (DFT) and time-dependent density functional theory (TD-DFT) calculations were performed with Gaussian 16 program suite.<sup>5</sup> Ground-state and excited-state geometry optimizations were carried out with DFT and TD-DFT calculations using B3LYP hybrid functional with Grimme’s D3 dispersion correction<sup>6</sup> (B3LYP-D3) and 6-31++G(d,p) basis set. Vibrational frequency calculations were performed to confirm that all optimized geometries converged to minima or saddle points for transition states. Zero-point and thermal corrections were made to the electronic energies to obtain Gibbs free energies of the optimized geometries. Solvation was considered by self-consistent reaction field (SCRF) calculations with conductor-like polarizable continuum model (CPCM) of CH<sub>2</sub>Cl<sub>2</sub> ( $\epsilon = 8.93$ ).<sup>7</sup> The S<sub>1</sub> potential energy curves of **BZ-1**, **BZ-2**, and **BZ-3'** (Fig. S1) are constructed by a relax scan along the fixed NH $\cdots$ X<sub>acceptor</sub> distance (29 points; step = 0.05 Å). The 2D S<sub>1</sub> potential energy surface of **BZ-3'** (Fig. 3b) was constructed by a relax scan along the fixed N1 $\cdots$ H1 and N1' $\cdots$ H1' distances (196 points; step = 0.1 Å). The minimum energy path of the ESIPT reaction (Fig. 3b, white line) was constructed by a relaxed scan of geometries with fixed N1 $\cdots$ H1 distance (from S<sub>1,N\*</sub> to S<sub>1,T\*</sub>) and fixed N1' $\cdots$ H1' distance (from S<sub>1,T\*</sub> to S<sub>1,TT\*</sub>) generated by linear interpolation between the stationary points. The proton transfer reaction coordinate (Fig. 3c) is represented by a cumulative distance of the minimum energy path (Fig. 3b, white line) starting from S<sub>1</sub> FC. The S<sub>1</sub> potential energy curve of protonated **BZ-3'** (Fig. S7) is constructed by a relax scan along the fixed C7–C6–C5–N1 dihedral angle (step = 20°) (9 points; step = 20°).

---

<sup>5</sup> M. J. Frisch, G. W. Trucks, H. B. Schlegel, G. E. Scuseria, M. A. Robb, J. R. Cheeseman, G. Scalmani, V. Barone, G. A. Petersson, H. Nakatsuji, X. Li, M. Caricato, A. V. Marenich, J. Bloino, B. G. Janesko, R. Gomperts, B. Mennucci, H. P. Hratchian, J. V. Ortiz, A. F. Izmaylov, J. L. Sonnenberg, D. Williams-Young, F. Ding, F. Lipparini, F. Egidi, J. Goings, B. Peng, A. Petrone, T. Henderson, D. Ranasinghe, V. G. Zakrzewski, J. Gao, N. Rega, G. Zheng, W. Liang, M. Hada, M. Ehara, K. Toyota, R. Fukuda, J. Hasegawa, M. Ishida, T. Nakajima, Y. Honda, O. Kitao, H. Nakai, T. Vreven, K. Throssell, J. A. Montgomery, Jr., J. E. Peralta, F. Ogliaro, M. J. Bearpark, J. J. Heyd, E. N. Brothers, K. N. Kudin, V. N. Staroverov, T. A. Keith, R. Kobayashi, J. Normand, K. Raghavachari, A. P. Rendell, J. C. Burant, S. S. Iyengar, J. Tomasi, M. Cossi, J. M. Millam, M. Klene, C. Adamo, R. Cammi, J. W. Ochterski, R. L. Martin, K. Morokuma, O. Farkas, J. B. Foresman, and D. J. Fox, Gaussian 16 (Revision B.01), Gaussian Inc., Wallingford, CT, 2016.

<sup>6</sup> S. Grimme, J. Antony, S. Ehrlich, and H. Krieg, *J. Chem. Phys.*, 2010, **132**, 154104.

<sup>7</sup> J. Tomasi, B. Mennucci, and R. Cammi, *Chem. Rev.*, 2005, **105**, 2999–3094.

**Scheme S1.** Synthetic route to **BZ-1**.

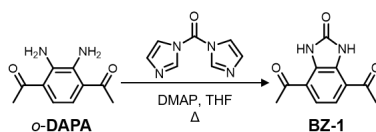

**1,1'-(2-Oxo-2,3-dihydro-1H-benzo[*d*]imidazole-4,7-diyl)bis(ethan-1-one) (BZ-1).** A 50 mL round-bottom was charged with 1,1'-(2,3-diamino-1,4-phenylene)bis(ethan-1-one) (*o*-DAPA) (91.1 mg, 0.474 mmol), 4-dimethylaminopyridine (10 mg, 0.081 mmol), 1,1'-carbonyldiimidazole (174 mg, 1.07 mmol), and THF (8 mL). The mixture was heated at reflux for 1 d. After cooling to r.t., the precipitate was gathered by filtration to furnish **BZ-1** as a yellow solid (25.0 mg, 0.115 mmol, yield = 24%). <sup>1</sup>H NMR (500 MHz, DMSO-*d*<sub>6</sub>, 298 K): δ 10.95 (s, 2H), 7.65 (s, 2H), 2.63 (s, 6H). <sup>13</sup>C NMR (100 MHz, DMSO-*d*<sub>6</sub>, 298 K): δ 198.42, 156.26, 130.69, 121.65, 120.87, 28.02. FT-IR(ATR, cm<sup>-1</sup>): 3744, 3711, 3629, 3312, 3192, 3006, 2988, 2923, 2851, 2650, 2374, 2337, 2325, 2287, 2186, 2163, 2051, 2020, 1981, 1966, 1711, 1665, 1597, 1497, 1462, 1370, 1319, 1276, 1259, 1221, 1200, 1143, 992. HRMS (ESI) calcd for C<sub>11</sub>H<sub>11</sub>N<sub>2</sub>O<sub>3</sub> [M+H]<sup>+</sup> 219.0764, found 219.0767.

**Scheme S2.** Synthetic route to **BZ-2**.

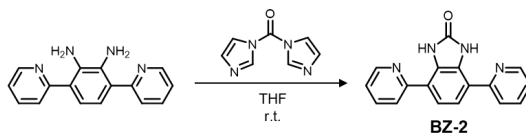

**4,7-Di(pyridin-2-yl)-1,3-dihydro-2H-benzo[*d*]imidazol-2-one (BZ-2).** A 20 mL vial was charged with 3,6-di(pyridin-2-yl)benzene-1,2-diamine (0.128 g, 0.381 mmol), 1,1'-carbonyldiimidazole (98.0 mg, 0.762 mmol), and THF (4 mL). The reaction mixture was stirred at r.t. for 1 d, diluted with MTBE (100 mL) and the precipitate was isolated by filtration to furnish **BZ-2** as a white solid (91.1 mg, 0.316 mmol, yield = 83%). <sup>1</sup>H NMR (500 MHz, CD<sub>2</sub>Cl<sub>2</sub>, 298 K): δ 10.38 (s, 2H), 8.70 (ddd, *J* = 4.9, 1.9, 1.0 Hz, 2H), 7.99 (dt, *J* = 8.1, 1.1 Hz, 2H), 7.85 (td, *J* = 7.8, 1.9 Hz, 2H), 7.67 (s, 2H), 7.27 (ddd, *J* = 7.4, 4.8, 1.1 Hz, 2H). <sup>13</sup>C NMR (125 MHz, CD<sub>2</sub>Cl<sub>2</sub>, 298 K): δ 155.66, 154.59, 148.98, 136.95, 129.56, 122.03, 119.78, 119.20, 117.99. FT-IR(ATR, cm<sup>-1</sup>): 3745, 3363, 3218, 3060, 3012, 2920, 2851, 2325, 2187, 2163, 2139, 2115, 2087, 2051, 1980, 1967, 1868, 1782, 1686, 1620, 1609, 1586, 1566, 1518, 1473, 1457, 1432, 1415, 1384, 1358, 1321, 1303, 1272, 1253, 1211, 1180, 1160, 1129, 1088, 1049, 988, 981, 936, 913, 893, 877. HRMS (ESI) calcd for C<sub>17</sub>H<sub>12</sub>N<sub>4</sub>O [M+H]<sup>+</sup> 289.1084, found 289.1085.

**Scheme S3.** Synthetic route to **BZ-3**.

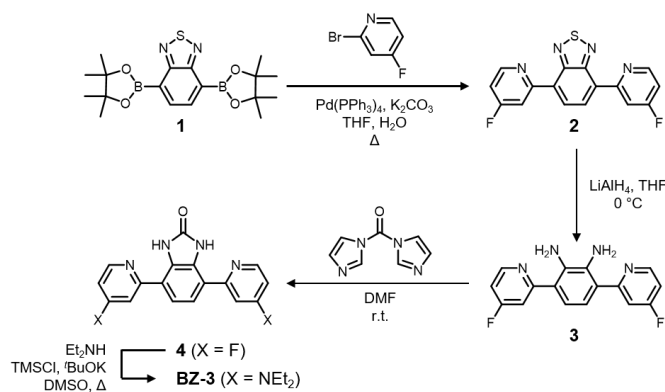

**4,7-Bis(4-fluoropyridin-2-yl)benzo[*c*][1,2,5]thiadiazole (2).** A 250 mL 3-neck round-bottom flask was charged with benzothiadiazole-4,7-bis(boronic acid pinacol ester) (**1**) (1.00 g, 2.58 mmol),  $\text{Pd}(\text{PPh}_3)_4$  (0.145 g, 0.129 mmol),  $\text{K}_2\text{CO}_3$  (1.75 g, 12.7 mmol), water (5 mL) and dry THF (50 mL) under an argon atmosphere. A portion of 2-bromo-4-fluoropyridine (0.56 mL, 5.4 mmol) was added and the solution was stirred at  $80^\circ\text{C}$  for 19 h. The reaction mixture was poured into water (100 mL), and extracted into  $\text{CH}_2\text{Cl}_2$  (100 mL  $\times$  3). The combined organic layer was dried over anhyd  $\text{Na}_2\text{SO}_4$ , filtered, and concentrated under reduced pressure. Flash column chromatography on  $\text{SiO}_2$  (hexane:EtOAc = 2:1 to 1:1, v/v) furnished **2** as a yellow solid (0.544 g, 1.67 mmol, yield = 65%).  $^1\text{H}$  NMR (400 MHz,  $\text{CDCl}_3$ , 298 K):  $\delta$  8.80 – 8.70 (m, 4H), 8.70 – 8.62 (m, 2H), 7.11 (dddd,  $J = 8.0, 5.5, 2.4, 1.1$  Hz, 2H).  $^{13}\text{C}$  NMR (125 MHz,  $\text{CD}_2\text{Cl}_2$ , 298 K):  $\delta$  170.65, 168.58, 156.94, 156.87, 154.05, 152.40, 152.35, 130.26, 113.60, 113.44, 111.40, 111.27. FT-IR(ATR,  $\text{cm}^{-1}$ ): 3711, 3103, 3072, 3006, 2988, 2924, 2853, 2650, 2317, 2287, 2186, 2163, 2141, 2051, 2012, 1982, 1716, 1670, 1591, 1576, 1565, 1543, 1462, 1417, 1374, 1345, 1295, 1275, 1261, 1211, 1169, 1113, 1081, 1006, 972, 867, 840, 824. HRMS (ESI) calcd for  $\text{C}_{16}\text{H}_8\text{F}_2\text{N}_4\text{S}$   $[\text{M}+\text{H}]^+$  327.0510, found 327.0515.

**3,6-Bis(4-fluoropyridin-2-yl)benzene-1,2-diamine (3).** An oven-dried 100 mL 2-neck round-bottom flask was charged with **2** (0.963 g, 2.95 mmol) and dry THF (100 mL) under an argon atmosphere. The solution was stirred at  $0^\circ\text{C}$ , and dry  $\text{LiAlH}_4$  (2 M in THF solution), (10 mL) was added dropwise over a period of 5 min. The reaction mixture was stirred at r.t. for 1 h and quenched with water (10 mL) at  $0^\circ\text{C}$ . The mixture was poured  $\text{CH}_2\text{Cl}_2$  (200 mL), dried over anhyd  $\text{Na}_2\text{SO}_4$ , filtered, and concentrated under reduced pressure. Flash column chromatography on  $\text{SiO}_2$  (hexane:EtOAc = 100:0 to 50:50, v/v) furnished **3** as an orange solid (0.472 g, 1.58 mmol, yield = 54%).  $^1\text{H}$  NMR (500 MHz,  $\text{CDCl}_3$ , 298 K):  $\delta$  8.63 (dd,  $J = 9.0, 5.7$  Hz, 2H), 7.46 (dd,  $J = 10.9, 2.4$  Hz, 2H), 7.12 (d,  $J = 1.0$  Hz, 2H), 6.97 (ddd,  $J = 8.3, 5.7, 2.4$  Hz, 2H), 5.70 (s, 4H).  $^{13}\text{C}$  NMR (125 MHz,  $\text{CDCl}_3$ , 298 K):  $\delta$  170.47, 168.39, 162.57, 162.51, 150.57, 150.51, 137.13, 122.21, 122.18, 118.78, 110.06, 109.93, 109.50, 109.36. FT-IR (ATR,  $\text{cm}^{-1}$ ): 3745, 3647, 3104, 3072, 2924, 2853, 2347, 2325, 2286, 2187, 2163, 2140, 2116, 2074, 2051, 1982, 1600, 1591, 1576, 1565, 1543, 1494, 1462, 1417, 1345, 1295, 1274, 1263, 1211, 1169, 1113, 1081, 1006, 972, 867, 840, 824. HRMS (ESI) calcd for  $\text{C}_{16}\text{H}_{12}\text{F}_2\text{N}_4$   $[\text{M}+\text{H}]^+$  299.1103, found 299.1105.

**4,7-Bis(4-fluoropyridin-2-yl)-1,3-dihydro-2*H*-benzo[*d*]imidazol-2-one (4).** A 250 mL round-bottom flask was charged with **3** (95.0 mg, 0.318 mmol), 1,1'-carbonyldiimidazole (155 mg, 0.956 mmol), and DMF (3 mL). The reaction mixture was stirred at r.t. for 1 d, diluted with MTBE (60 mL), and the precipitate was isolated by filtration to furnish **4** as a white solid (73.0 mg, 0.225

mmol, yield = 71%). <sup>1</sup>H NMR (500 MHz, CDCl<sub>3</sub>, 298 K): δ 10.39 (s, 2H), 8.66 (dd, *J* = 8.7, 5.6 Hz, 2H), 7.65 (dd, *J* = 10.5, 2.3 Hz, 2H), 7.57 (s, 2H), 7.02 (ddd, *J* = 8.0, 5.6, 2.3 Hz, 2H). <sup>13</sup>C NMR (125 MHz, DMSO-*d*<sub>6</sub>, 298 K): δ 170.47, 168.42, 158.61, 158.55, 155.22, 152.62, 152.56, 129.58, 119.57, 119.54, 119.49, 110.67, 110.53, 108.70, 108.56. FT-IR(ATR, cm<sup>-1</sup>): 3186, 3006, 2971, 2925, 2870, 2852, 2692, 2341, 2325, 2287, 2187, 2163, 2143, 2074, 2051, 2023, 1981, 1701, 1594, 1537, 1508, 1454, 1377, 1357, 1304, 1273, 1255, 1197, 1176, 1159, 1138, 1097, 1079, 1059, 1027, 986, 869, 834, 809. HRMS (ESI) calcd for C<sub>17</sub>H<sub>10</sub>F<sub>2</sub>N<sub>4</sub>O [M+H]<sup>+</sup> 325.0895, found 325.0902.

**4,7-Bis(4-(diethylamino)pyridin-2-yl)-1,3-dihydro-2*H*-benzo[*d*]imidazol-2-one (BZ-3).** A 10–20 mL Biotage® Microwave Reaction Vial was charged with **4** (49.3 mg, 0.152 mmol), diethylamine (0.5 mL, 10 mmol), TMSCl (0.1 mL, 0.8 mmol), KO<sub>t</sub>Bu (34.6 mg, 0.308 mmol), and DMSO (5 mL) under a argon sparge. The mixture was heated by microwave irradiation at 100 °C with stirring for 12 h, cooled to r.t., poured into EtOAc (100 mL), and washed with water (75 mL × 3). The organic layer was dried over anhyd Na<sub>2</sub>SO<sub>4</sub>, filtered, and concentrated under reduced pressure. Flash column chromatography on SiO<sub>2</sub> (CH<sub>2</sub>Cl<sub>2</sub>:MeOH = 10:0 to 9:1, v/v) furnished **BZ-3** as a white solid (58.3 mg, 0.135 mmol, yield = 89%). <sup>1</sup>H NMR (500 MHz, CDCl<sub>3</sub>, 298 K): δ 10.52 (s, 2H), 8.25 (d, *J* = 6.0 Hz, 2H), 7.53 (s, 2H), 7.05 (d, *J* = 2.5 Hz, 2H), 6.45 (dd, *J* = 6.1, 2.5 Hz, 2H), 3.46 (q, *J* = 7.2 Hz, 8H), 1.25 (t, *J* = 7.1 Hz, 12H). <sup>13</sup>C NMR (125 MHz, CDCl<sub>3</sub>, 298 K): δ 156.07, 155.11, 152.85, 149.17, 129.74, 120.22, 117.82, 105.28, 102.14, 44.16, 12.55. FT-IR(ATR, cm<sup>-1</sup>): 3745, 3243, 3004, 2972, 2931, 2894, 2325, 2193, 2164, 2140, 2116, 2051, 1982, 1967, 1690, 1593, 1538, 1493, 1474, 1425, 1377, 1354, 1308, 1297, 1274, 1260, 1197, 1156, 1137, 1094, 1080, 1028, 988, 913, 836. HRMS (ESI) calcd for C<sub>25</sub>H<sub>30</sub>N<sub>6</sub>O [M+H]<sup>+</sup> 431.2554, found 431.2562.

**Scheme S4.** Synthetic route to **BZ-4**.

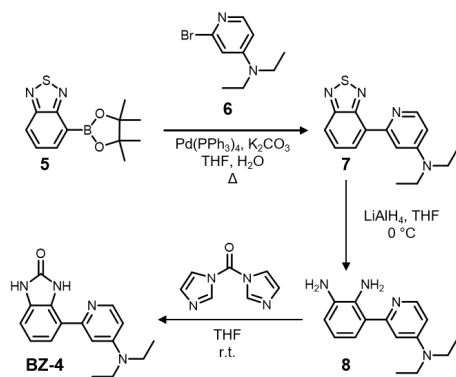

**2-Bromo-*N,N*-diethylpyridin-4-amine (6).** A 250 mL round-bottom flask was charged with 2-bromo-4-fluoropyridine (3.0 mL, 29 mmol), diethylamine (6.0 mL, 58 mmol), K<sub>2</sub>CO<sub>3</sub> (8.00 g, 57.9 mmol), and DMF (60 mL). The solution was stirred at 65 °C for 1 d, and concentrated under reduced pressure at 70 °C. The reaction mixture was poured into water (100 mL), and extracted into EtOAc (150 mL × 3). The combined organic layer dried over anhyd Na<sub>2</sub>SO<sub>4</sub>, filtered, and concentrated under reduced pressure. Flash column chromatography on SiO<sub>2</sub> (hexane:EtOAc = 100:0 to 50:50, v/v) furnished **6** as a yellow liquid (6.56 g, 28.7 mmol, yield = 99%). <sup>1</sup>H NMR (500 MHz, CDCl<sub>3</sub>, 298 K): δ 7.88 (d, *J* = 6.1 Hz, 1H), 6.58 (d, *J* = 2.5 Hz, 1H), 6.38 (dd, *J* = 6.1, 2.5 Hz, 1H), 3.31 (q, *J* = 7.1 Hz, 4H), 1.15 (t, *J* = 7.2 Hz, 6H). <sup>13</sup>C NMR (125 MHz, CDCl<sub>3</sub>, 298 K): δ 153.80, 149.58, 143.45, 108.82, 106.00, 44.17, 12.28. FT-IR(ATR, cm<sup>-1</sup>): 3728, 3647, 3417, 3172,

3146, 3088, 3037, 2972, 2932, 2899, 2871, 2760, 2664, 2559, 2525, 2504, 2446, 2380, 2363, 2347, 2325, 2275, 2204, 2164, 2144, 2103, 2087, 2051, 2012, 1981, 1904, 1771, 1733, 1661, 1585, 1514, 1503, 1476, 1448, 1401, 1378, 1358, 1307, 1288, 1273, 1252, 1193, 1167, 1129, 1093, 1074, 1015, 974, 923, 808. HRMS (ESI) calcd for C<sub>9</sub>H<sub>13</sub>BrN<sub>2</sub> [M+H]<sup>+</sup> 229.0335 and 231.0314, found 229.0337 and 231.0314.

**2-(Benzo[*c*][1,2,5]thiadiazol-4-yl)-*N,N*-diethylpyridin-4-amine (7).** A 100 mL 3-neck round-bottom flask was charged with 4-(4,4,5,5-tetramethyl-1,3,2-dioxaborolan-2-yl)benzo[*c*][1,2,5]thiadiazole (**5**) (0.512 g, 1.95 mmol), Pd(PPh<sub>3</sub>)<sub>4</sub> (0.126 g, 0.109 mmol), K<sub>2</sub>CO<sub>3</sub> (1.34 g, 9.70 mmol), **6** (0.509 g, 2.22 mmol), water (5 mL), and dry THF (25 mL) under an argon atmosphere. The solution was stirred at 80 °C for 1 d. The reaction mixture was poured into water (100 mL), and extracted into EtOAc (100 mL × 3). The combined organic layer was dried over anhyd Na<sub>2</sub>SO<sub>4</sub>, filtered, and concentrated under reduced pressure. Flash column chromatography on SiO<sub>2</sub> (CH<sub>2</sub>Cl<sub>2</sub>:acetone = 9:1 to 7:3, v/v) furnished **7** as a yellow gummy material (0.313 g, 1.10 mmol, yield = 56%). <sup>1</sup>H NMR (500 MHz, CDCl<sub>3</sub>, 298 K): δ 8.37 – 8.32 (m, 2H), 8.02 (dd, *J* = 8.7, 1.2 Hz, 1H), 7.84 (d, *J* = 2.6 Hz, 1H), 7.71 (dd, *J* = 8.7, 7.0 Hz, 1H), 6.51 (dd, *J* = 6.0, 2.7 Hz, 1H), 3.46 (q, *J* = 7.1 Hz, 4H), 1.25 (t, *J* = 7.1 Hz, 6H). <sup>13</sup>C NMR (125 MHz, CDCl<sub>3</sub>, 298 K): δ 155.79, 154.29, 153.16, 152.60, 149.85, 133.49, 129.72, 128.93, 121.45, 108.13, 105.52, 105.50, 44.15, 12.46. FT-IR(ATR, cm<sup>-1</sup>): 3347, 3171, 3133, 3088, 3062, 3039, 2969, 2928, 2895, 2870, 2569, 2513, 2398, 2325, 2292, 2186, 2163, 2115, 2080, 2051, 1981, 1939, 1904, 1840, 1733, 1707, 1668, 1601, 1583, 1539, 1495, 1477, 1447, 1406, 1377, 1357, 1327, 1285, 1265, 1244, 1197, 1156, 1134, 1115, 1095, 1078, 1022, 983, 914, 896, 855, 832, 805. HRMS (ESI) calcd for C<sub>15</sub>H<sub>16</sub>N<sub>4</sub>S [M+H]<sup>+</sup> 285.1168, found 285.1170.

**3-(4-(Diethylamino)pyridin-2-yl)benzene-1,2-diamine (8).** An 100 mL oven-dried 2-neck round-bottom flask was charged with **7** (0.200 g, 0.703 mmol) and dry THF (20 mL) under an argon atmosphere. The solution was stirred at 0 °C, and dry LiAlH<sub>4</sub> (2 M in THF solution), (2.8 mL) was added dropwise over a period of 1 min. The reaction mixture was stirred at r.t. for 1 h and quenched with water (3 mL) at 0 °C. The mixture was poured into CH<sub>2</sub>Cl<sub>2</sub> (200 mL), dried over anhyd Na<sub>2</sub>SO<sub>4</sub>, filtered, and concentrated under reduced pressure. Flash column chromatography on SiO<sub>2</sub> (CH<sub>2</sub>Cl<sub>2</sub>:MeOH = 100:0 to 9:1, v/v) furnished **8** as a red solid (0.111 g, 0.435 mmol, yield = 62%). <sup>1</sup>H NMR (400 MHz, CDCl<sub>3</sub>, 298 K): δ 8.23 (dd, *J* = 6.1, 1.5 Hz, 1H), 7.01 (dt, *J* = 6.8, 1.9 Hz, 1H), 6.80 – 6.57 (m, 3H), 6.42 (dd, *J* = 6.0, 2.5 Hz, 1H), 3.45 – 3.37 (m, 4H), 1.21 (td, *J* = 7.1, 1.4 Hz, 6H). <sup>13</sup>C NMR (125 MHz, CDCl<sub>3</sub>, 298 K): δ 159.91, 153.08, 148.67, 135.38, 135.31, 126.12, 121.10, 118.42, 116.59, 105.53, 104.60, 44.04, 12.57. FT-IR(ATR, cm<sup>-1</sup>): 3395, 3329, 3088, 3061, 3029, 2971, 2929, 2894, 2870, 2719, 2522, 2455, 2389, 2325, 2288, 2178, 2163, 2139, 2103, 2087, 2051, 2023, 2009, 1981, 1908, 1731, 1591, 1535, 1502, 1462, 1431, 1395, 1377, 1358, 1293, 1259, 1241, 1196, 1158, 1126, 1094, 1077, 1020, 987, 950, 913, 881, 845. HRMS (ESI) calcd for C<sub>15</sub>H<sub>20</sub>N<sub>4</sub> [M+H]<sup>+</sup> 257.1761, found 257.1763.

**2-(Benzo[*c*][1,2,5]thiadiazol-4-yl)-*N,N*-diethylpyridin-4-amine (BZ-4).** A 20 mL vial was charged with **10** (0.111 g, 0.435 mmol), 1,1'-carbonyldiimidazole (82.9 mg, 0.522 mmol), and DMF (12 mL). The reaction mixture was stirred at r.t. for 1 d, poured into EtOAc (100 mL), and washed with water (75 mL × 3). The organic layer was dried over anhyd Na<sub>2</sub>SO<sub>4</sub>, filtered, and concentrated under reduced pressure. Flash column chromatography on SiO<sub>2</sub> (CH<sub>2</sub>Cl<sub>2</sub>:MeOH = 10:0 to 9:1, v/v) furnished **BZ-4** as a yellow solid (87.2 mg, 0.309 mmol, yield = 71%). <sup>1</sup>H NMR (500 MHz, CDCl<sub>3</sub>, 298 K): δ 9.91 (s, 1H), 8.23 (d, *J* = 6.0 Hz, 1H), 7.48 (dd, *J* = 7.6, 1.6 Hz, 1H), 7.13 – 7.05 (m, 2H), 7.03 (d, *J* = 2.5 Hz, 1H), 6.44 (dd, *J* = 6.1, 2.5 Hz, 1H), 3.44 (q, *J* = 7.1 Hz, 4H), 1.29 – 1.20 (m, 6H). <sup>13</sup>C NMR (125 MHz, CDCl<sub>3</sub>, 298 K): δ 156.40, 156.23, 152.87, 149.24, 130.37, 128.61, 121.21, 120.81, 118.15, 109.73, 105.31, 102.03, 44.12, 12.55. FT-IR(ATR, cm<sup>-1</sup>): 3172, 3074, 3022, 2972, 2926, 2870, 2853, 2767, 2690, 2531, 2346, 2324, 2243, 2187, 2179, 2163, 2115, 2087, 2051, 2039, 2011,

1980, 1919, 1892, 1871, 1846, 1827, 1794, 1694, 1620, 1592, 1537, 1505, 1480, 1448, 1398, 1377, 1357, 1303, 1267, 1252, 1197, 1177, 1159, 1138, 1097, 1078, 1059, 1027, 986, 911, 875, 834, 809. HRMS (ESI) calcd for C<sub>16</sub>H<sub>18</sub>N<sub>4</sub>O [M+H]<sup>+</sup> 283.1553, found 283.1555.

**Scheme S5.** Synthetic route to **BZ-5**.

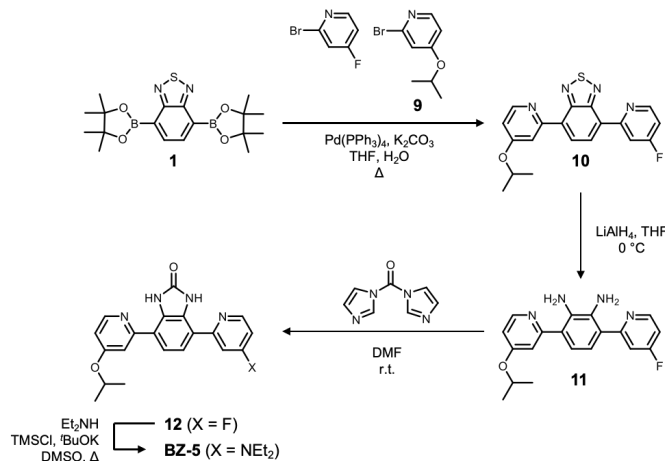

**2-Bromo-4-isopropoxy-pyridine (9).** A 250 mL round-bottom flask was charged with 2-bromo-4-hydroxypyridine (3.72 g, 21.4 mmol), 2-bromopropane (6 mL, 50 mmol), K<sub>2</sub>CO<sub>3</sub> (5.99 g, 43.4 mmol), and MeCN (100 mL). The reaction mixture was stirred at 80 °C for 1 d, filtered with glass frit and Celite, washed with acetone, and concentrated under reduced pressure. Flash column chromatography on SiO<sub>2</sub> (hexane:EtOAc = 10:0 to 8:2, v/v) furnished **9** as a yellow liquid (4.20 g, 19.4 mmol, yield = 91%). <sup>1</sup>H NMR (500 MHz, CDCl<sub>3</sub>, 298 K): δ 8.14 (d, *J* = 5.7 Hz, 1H), 6.96 (d, *J* = 2.3 Hz, 1H), 6.73 (dd, *J* = 5.8, 2.3 Hz, 1H), 4.60 (p, *J* = 6.1 Hz, 1H), 1.36 (d, *J* = 6.1 Hz, 6H). <sup>13</sup>C NMR (125 MHz, CDCl<sub>3</sub>, 298 K): δ 165.33, 150.66, 142.99, 142.97, 114.37, 111.07, 70.86, 21.63. FT-IR (ATR, cm<sup>-1</sup>): 3797, 3647, 3421, 3160, 3133, 3059, 2979, 2934, 2878, 2768, 2699, 2647, 2606, 2534, 2497, 2325, 2291, 2219, 2186, 2164, 2140, 2103, 2051, 2012, 1981, 1916, 1867, 1768, 1668, 1577, 1542, 1468, 1422, 1383, 1357, 1331, 1302, 1268, 1255, 1231, 1179, 1140, 1105, 1061, 984, 960, 914, 882, 868, 854, 835, 817, 800. HRMS (ESI) calcd for C<sub>8</sub>H<sub>10</sub>BrNO [M+H]<sup>+</sup> 216.0019 and 217.9998, found 216.0021 and 218.0000.

**4-(4-Fluoropyridin-2-yl)-7-(4-isopropoxy-pyridin-2-yl)benzo[*c*][1,2,5]thiadiazole (10).**<sup>8</sup> A 250 mL 3-neck round-bottom flask was charged with benzothiadiazole-4,7-bis(boronic acid pinacol ester) (**1**) (2.45 g, 6.30 mmol), **9** (2.72 g, 12.6 mmol), Pd(PPh<sub>3</sub>)<sub>4</sub> (0.383 g, 0.331 mmol), K<sub>2</sub>CO<sub>3</sub> (4.36 g, 31.6 mmol), water (6 mL), and dry THF (60 mL) under an argon atmosphere. 2-bromo-4-fluoropyridine (0.62 mL, 6.0 mmol) was added and the solution was stirred at 80 °C for 1 d. The reaction mixture was poured into water (100 mL), and extracted into CH<sub>2</sub>Cl<sub>2</sub> (150 mL × 3). The combined organic layer was dried over anhyd Na<sub>2</sub>SO<sub>4</sub>, filtered, and concentrated under reduced pressure. Flash column chromatography on SiO<sub>2</sub> (hexane:EtOAc = 10:0 to 1:1, v/v) furnished **10** as a yellow solid (0.614 g, 1.68 mmol, yield = 27%). <sup>1</sup>H NMR (500 MHz, CDCl<sub>3</sub>, 298 K): δ 8.76 (dd, *J* = 8.8, 5.5 Hz, 1H), 8.70 (d, *J* = 7.6 Hz, 1H), 8.68 – 8.57 (m, 3H), 8.29 (d, *J* = 2.4 Hz, 1H), 7.09 (ddd, *J* = 7.9, 5.6, 2.4 Hz, 1H), 6.85 (dd, *J* = 5.7, 2.4 Hz, 1H), 4.80 (hept, *J* = 6.0 Hz, 1H), 1.46

<sup>8</sup> To compensate for the reactivity difference between 2-bromo-4-fluoropyridine and 2-bromo-4-isopropoxy-pyridine, an optimized molar ratio of 0.95:2 was used for the synthesis of **10**.

(d,  $J = 6.1$  Hz, 6H).  $^{13}\text{C}$  NMR (125 MHz,  $\text{CDCl}_3$ , 298 K):  $\delta$  170.26, 168.18, 164.80, 156.95, 156.88, 155.35, 153.85, 153.65, 151.91, 151.86, 150.98, 133.09, 130.11, 129.63, 113.28, 113.13, 113.01, 110.98, 110.85, 110.50, 70.40, 21.97. FT-IR(ATR,  $\text{cm}^{-1}$ ): 3727, 3185, 3104, 3064, 2978, 2924, 2852, 2633, 2359, 2342, 2325, 2287, 2187, 2163, 2141, 2051, 1981, 1912, 1716, 1593, 1570, 1544, 1493, 1460, 1424, 1406, 1386, 1374, 1346, 1313, 1298, 1276, 1261, 1224, 1179, 1140, 1112, 1053, 1006, 999, 991, 973, 945, 898, 872, 848, 819. HRMS (ESI) calcd for  $\text{C}_{19}\text{H}_{15}\text{FN}_4\text{OS}$   $[\text{M}+\text{H}]^+$  367.1026, found 367.1026.

**3-(4-Fluoropyridin-2-yl)-6-(4-isopropoxyppyridin-2-yl)benzene-1,2-diamine (11).** An oven-dried 250 mL 3-neck round-bottom flask was charged with **10** (0.532 g, 1.45 mmol) and dry THF (80 mL) under an argon atmosphere. The solution was stirred at 0 °C, and dry  $\text{LiAlH}_4$  (2 M in THF solution) (6 mL), was added dropwise over a period of 5 min. The reaction mixture was stirred at r.t. for 1 h and quenched with water (6 mL) at 0 °C. The mixture was poured  $\text{CH}_2\text{Cl}_2$  (150 mL), dried over anhyd  $\text{Na}_2\text{SO}_4$ , filtered, and concentrated under reduced pressure. Flash column chromatography on  $\text{SiO}_2$  (hexane:EtOAc = 2:1 to 1:1, v/v) furnished **11** as an orange solid (0.374 g, 1.00 mmol, yield = 76%).  $^1\text{H}$  NMR (500 MHz,  $\text{CDCl}_3$ , 298 K):  $\delta$  8.62 (dd,  $J = 9.0, 5.6$  Hz, 1H), 8.46 (d,  $J = 5.8$  Hz, 1H), 7.46 (dd,  $J = 11.0, 2.4$  Hz, 1H), 7.17 (d,  $J = 2.4$  Hz, 1H), 7.12 – 7.05 (m, 2H), 6.95 (ddd,  $J = 8.2, 5.7, 2.4$  Hz, 1H), 6.73 (dd,  $J = 5.8, 2.4$  Hz, 1H), 5.64 (s, 4H), 4.72 (hept,  $J = 6.1$  Hz, 1H), 1.41 (d,  $J = 6.1$  Hz, 6H).  $^{13}\text{C}$  NMR (125 MHz,  $\text{CDCl}_3$ , 298 K):  $\delta$  170.44, 168.36, 165.00, 162.80, 162.75, 160.95, 150.52, 150.46, 149.57, 137.08, 136.51, 124.22, 121.72, 121.69, 118.98, 118.82, 109.98, 109.93, 109.79, 109.31, 109.18, 109.14, 70.11, 21.96. FT-IR(ATR,  $\text{cm}^{-1}$ ): 3710, 3402, 3277, 3069, 2978, 2932, 2647, 2511, 2374, 2360, 2342, 2325, 2187, 2163, 2139, 2051, 1999, 1981, 1963, 1919, 1847, 1590, 1574, 1560, 1492, 1462, 1443, 1395, 1375, 1326, 1301, 1258, 1229, 1179, 1159, 1140, 1107, 1059, 994, 948, 909, 867, 841, 821. HRMS (ESI) calcd for  $\text{C}_{19}\text{H}_{19}\text{FN}_4\text{O}$   $[\text{M}+\text{H}]^+$  339.1616, found 339.1617.

**4-(4-Fluoropyridin-2-yl)-7-(4-isopropoxyppyridin-2-yl)-1,3-dihydro-2H-benzo[d]imidazol-2-one (12).** A 20 mL vial was charged with **11** (105 mg, 0.311 mmol), 1,1'-carbonyldiimidazole (198 mg, 1.22 mmol), and THF (10 mL). The reaction mixture was stirred at 40 °C for 2 d and concentrated under reduced pressure. Flash column chromatography on  $\text{SiO}_2$  (hexane:EtOAc = 100:0 to 0:100, v/v) furnished **12** as a white solid (95.6 mg, 0.262 mmol, yield = 84%).  $^1\text{H}$  NMR (400 MHz,  $\text{CDCl}_3$ , 298 K):  $\delta$  10.54 (s, 2H), 10.34 (s, 2H), 8.64 (dd,  $J = 8.7, 5.7$  Hz, 1H), 8.47 (dd,  $J = 5.7, 1.6$  Hz, 1H), 7.63 (dd,  $J = 10.6, 2.3$  Hz, 1H), 7.56 (dd,  $J = 7.2, 5.6$  Hz, 2H), 7.40 (d,  $J = 2.3$  Hz, 1H), 7.00 (ddd,  $J = 8.2, 6.0, 2.4$  Hz, 1H), 6.76 (dd,  $J = 5.7, 2.3$  Hz, 1H), 4.74 (h,  $J = 5.9$  Hz, 1H), 1.43 (dt,  $J = 6.0, 1.0$  Hz, 6H).  $^{13}\text{C}$  NMR (125 MHz,  $\text{CDCl}_3$ , 298 K):  $\delta$  170.51, 168.42, 164.97, 159.03, 158.98, 157.08, 154.90, 151.55, 151.49, 150.45, 129.84, 129.76, 120.13, 118.24, 118.12, 110.16, 110.03, 109.30, 107.74, 107.49, 107.34, 70.35, 21.94. FT-IR(ATR,  $\text{cm}^{-1}$ ): 3388, 3197, 3145, 3071, 3021, 2979, 2937, 2635, 2325, 2284, 2239, 2163, 2103, 2051, 2040, 2013, 1980, 1951, 1914, 1854, 1743, 1720, 1629, 1598, 1573, 1520, 1485, 1467, 1412, 1387, 1360, 1313, 1274, 1261, 1222, 1172, 1139, 1109, 1077, 1013, 997, 981, 957, 932, 913, 881, 857, 825. HRMS (ESI) calcd for  $\text{C}_{20}\text{H}_{17}\text{FN}_4\text{O}_2$   $[\text{M}+\text{H}]^+$  365.1408, found 365.1412.

**4-(4-(Diethylamino)pyridin-2-yl)-7-(4-isopropoxyppyridin-2-yl)-1,3-dihydro-2H-benzo[d]imidazol-2-one (BZ-5).** A 10–20 mL Biotage® Microwave Reaction Vial was charged with **12** (71.0 mg, 0.195 mmol), diethylamine (0.8 mL, 4 mmol),  $\text{TMSCl}$  (0.4 mL, 3 mmol),  $\text{KO}_t\text{Bu}$  (50.3 mg, 0.448 mmol), and DMSO (7 mL) under argon sparge. The mixture was heated by microwave irradiation at 100 °C with stirring for 12 h, cooled to r.t., poured into EtOAc (100 mL), and washed with water (75 mL  $\times$  3). The organic layer was dried over anhyd  $\text{Na}_2\text{SO}_4$ , filtered, and concentrated under reduced pressure. Flash column chromatography on  $\text{SiO}_2$  (hexane:acetone = 10:0 to 1:1, v/v) furnished **BZ-5** as a white-yellow solid (33.6 mg, 0.0805 mmol, yield = 41%).  $^1\text{H}$



NMR (500 MHz, CDCl<sub>3</sub>, 298 K):  $\delta$  10.44 (s, 1H), 8.46 (d,  $J = 5.9$  Hz, 1H), 8.25 (d,  $J = 6.1$  Hz, 1H), 7.53 (s, 2H), 7.38 (d,  $J = 2.3$  Hz, 1H), 7.06 (s, 1H), 6.76 – 6.71 (m, 1H), 6.46 (d,  $J = 6.2$  Hz, 1H), 4.77 – 4.71 (m, 1H), 3.46 (q,  $J = 7.2$  Hz, 4H), 1.42 (d,  $J = 6.1$  Hz, 6H), 1.25 (t,  $J = 7.1$  Hz, 6H). <sup>13</sup>C NMR (125 MHz, CDCl<sub>3</sub>, 298 K):  $\delta$  164.89, 157.59, 156.01, 155.05, 152.85, 150.43, 149.29, 129.85, 129.72, 120.76, 119.05, 117.89, 117.85, 109.00, 107.46, 105.40, 102.18, 70.26, 44.14, 29.84, 21.95, 12.57. FT-IR(ATR, cm<sup>-1</sup>): 3746, 3356, 3088, 3073, 2973, 2924, 2870, 2854, 2524, 2325, 2287, 2239, 2163, 2139, 2115, 2083, 2066, 2051, 2011, 1992, 1980, 1967, 1943, 1910, 1896, 1868, 1811, 1780, 1767, 1704, 1642, 1588, 1557, 1537, 1522, 1500, 1468, 1434, 1416, 1377, 1357, 1303, 1252, 1226, 1194, 1159, 1140, 1109, 1084, 1027, 1010, 994, 988, 937, 910, 874, 863, 801. HRMS (ESI) calcd for C<sub>24</sub>H<sub>27</sub>N<sub>5</sub>O<sub>2</sub> [M+H]<sup>+</sup> 418.2238, found 418.2239.

**X-ray Crystallographic Studies on BZ-3.** Single crystals of **BZ-3** were prepared by slow diffusion of methyl *tert*-butyl ether into a CHCl<sub>3</sub> solution of this material. A colorless crystal (approximate dimensions 0.587 × 0.416 × 0.357 mm<sup>3</sup>) was placed onto a nylon loop with Paratone-N oil, and mounted on an XtaLAB AFC12 (RINC): Kappa dual home/near diffractometer. The data collection was carried out using Cu K $\alpha$  radiation and the crystal was kept at  $T = 93$  K. A total of 19770 reflections were measured ( $7.896^\circ \leq 2\theta \leq 158.828^\circ$ ). The structure was solved with SHELXT<sup>9</sup> using direct methods, and refined with SHELXL<sup>10</sup> refinement package of OLEX2.<sup>11</sup> A total of 5672 unique reflections were used in all calculations. The final  $R1$  was 0.0657 ( $I \geq 2\sigma(I)$ ) and  $wR2$  was 0.1841 (all data). CCDC 2367198 contains the supplementary crystallographic data for this structure.

<sup>9</sup> G. M. Sheldrick, *Acta Cryst.*, 2015, **A71**, 3–8.

<sup>10</sup> G. M. Sheldrick, *Acta Cryst.*, 2015, **C71**, 3–8.

<sup>11</sup> O. V. Dolomanov, L. J. Bourhis, R. J. Gildea, J. A. K. Howard, and H. Puschmann, *J. Appl. Cryst.*, 2009, **42**, 339–341.

**Table S1.** Photophysical properties of compounds **BZ-1**, **BZ-2**, **BZ-3**, **BZ-4** and **BZ-5** in CH<sub>2</sub>Cl<sub>2</sub> at  $T = 298$  K.

|             | $\lambda_{\max,\text{abs}}$ (nm) <sup>a</sup> | $\varepsilon$ (M <sup>-1</sup> cm <sup>-1</sup> ) | $\Delta\nu$ (cm <sup>-1</sup> ) | $\lambda_{\max,\text{em}}$ (nm) | $\Phi_{\text{F}}$ <sup>b</sup> |
|-------------|-----------------------------------------------|---------------------------------------------------|---------------------------------|---------------------------------|--------------------------------|
| <b>BZ-1</b> | 380                                           | 9000                                              | 3894                            | 446                             | 0.01                           |
| <b>BZ-2</b> | 324                                           | 56800                                             | –                               | –                               | –                              |
| <b>BZ-3</b> | 312                                           | 25800                                             | 12405                           | 509                             | 0.21                           |
| <b>BZ-4</b> | 314                                           | 6220                                              | 12123                           | 507                             | 0.24                           |
| <b>BZ-5</b> | 314                                           | 22800                                             | 12579                           | 519                             | 0.22                           |

<sup>a</sup> The longest absorption wavelength.

<sup>b</sup> Absolute fluorescence quantum yields determined by a calibrated integrating sphere system.

**Table S2.** Solvent-dependent photophysical properties of **BZ-3** ( $T = 298$  K).

| solvent                         | $\lambda_{\max,\text{abs}}$ (nm) | $\lambda_{\max,\text{em}}$ (nm) | $\nu_{\max,\text{em}}$ (cm <sup>-1</sup> ) |
|---------------------------------|----------------------------------|---------------------------------|--------------------------------------------|
| cyclohexane                     | 313                              | 531                             | 18832                                      |
| EtOAc                           | 312                              | 491                             | 20366                                      |
| CH <sub>2</sub> Cl <sub>2</sub> | 310                              | 509                             | 19646                                      |
| MeOH                            | 312                              | 497                             | 20120                                      |

**Table S3.** Summary of X-ray crystallographic data of **BZ-3**.

|                                                     | <b>BZ-3</b> · CHCl <sub>3</sub>                                      |
|-----------------------------------------------------|----------------------------------------------------------------------|
| Chemical formula                                    | C <sub>25</sub> H <sub>30</sub> N <sub>6</sub> O · CHCl <sub>3</sub> |
| Formula weight                                      | 549.92                                                               |
| Crystal system                                      | monoclinic                                                           |
| Space group                                         | <i>P2</i> <sub>1</sub> / <i>n</i>                                    |
| Color of crystal                                    | colorless                                                            |
| <i>a</i> (Å)                                        | 12.18070(10)                                                         |
| <i>b</i> (Å)                                        | 11.62690(10)                                                         |
| <i>c</i> (Å)                                        | 19.3144(2)                                                           |
| $\beta$ (°)                                         | 102.2310(10)                                                         |
| Volume (Å <sup>3</sup> )                            | 2673.29(4)                                                           |
| <i>Z</i>                                            | 4                                                                    |
| <i>R</i> <sub>int</sub>                             | 0.0741                                                               |
| Final <i>R</i> indices [ <i>I</i> > 2σ( <i>I</i> )] | <i>R</i> 1 = 0.0657, <i>wR</i> 2 = 0.1816                            |
| Final <i>R</i> indices [all data]                   | <i>R</i> 1 = 0.0676, <i>wR</i> 2 = 0.1841                            |
| Goodness-of-fit on <i>F</i> <sup>2</sup>            | 1.065                                                                |

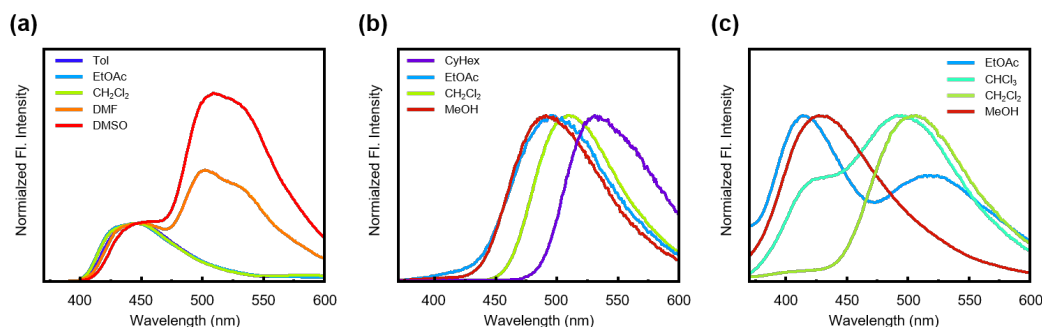

**Fig. S1.** Normalized emission spectra of (a) **BZ-1**, (b) **BZ-3**, and (c) **BZ-4** in different solvents at  $T = 298$  K.

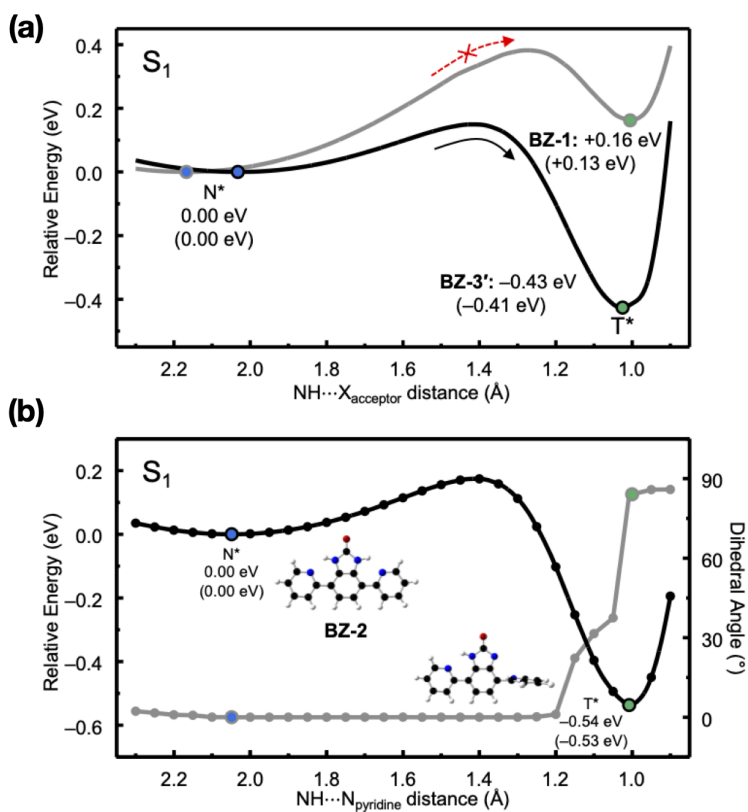

**Fig. S2.** (a) Potential energy curves of the  $\text{S}_1$  state constructed at the TD-B3LYP-D3/6-31++G(d,p) level of theory with implicit solvation (CPCM) in  $\text{CH}_2\text{Cl}_2$  by a relaxed scan along the fixed  $\text{NH}\cdots\text{X}_{\text{acceptor}}$  distance (step =  $0.05 \text{ \AA}$ ).  $\text{X} = \text{O}$  (**BZ-1**);  $\text{N}$  (**BZ-3'**). (b) Potential energy curve (black line) and dihedral angle between the benzimidazolone and pyridine (gray line) of **BZ-2** in the  $\text{S}_1$  state constructed at the TD-B3LYP-D3/6-31++G(d,p) level of theory with implicit solvation (CPCM) in  $\text{CH}_2\text{Cl}_2$  by a relaxed scan along the fixed  $\text{NH}\cdots\text{N}_{\text{pyridine}}$  distance (step =  $0.05 \text{ \AA}$ ). Relative electronic energies of the stationary points (lined circles) are given, and the numbers in parenthesis indicate relative Gibbs free energy values.

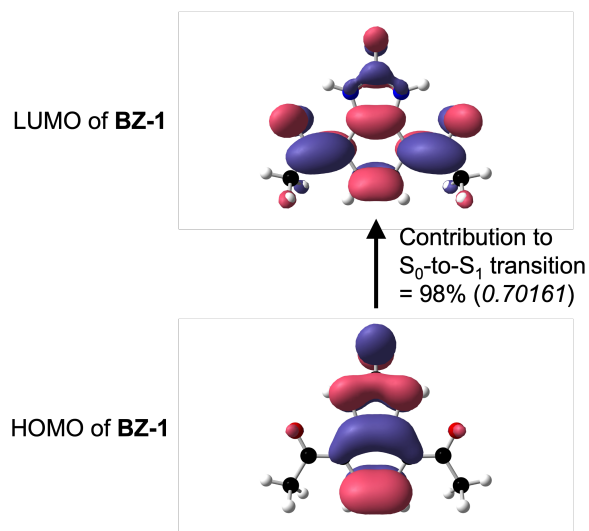

**Fig. S3.** Frontier molecular orbitals (FMOs) involved in the transition to the  $S_1$  excited state of **BZ-1** calculated at the TD-B3LYP-D3/6-31G++G(d,p) level of theory with implicit solvation (CPCM) in  $\text{CH}_2\text{Cl}_2$ . The contribution of the HOMO $\rightarrow$ LUMO electronic transition to the  $S_0$ -to- $S_1$  transition is shown, with the number in parentheses denoting the CI (configurational interaction) expansion coefficient.

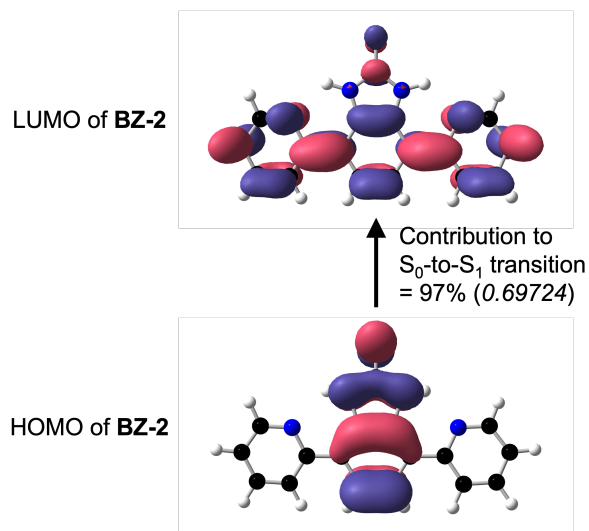

**Fig. S4.** Frontier molecular orbitals (FMOs) involved in the transition to the  $S_1$  excited state of **BZ-2** calculated at the TD-B3LYP-D3/6-31G++G(d,p) level of theory with implicit solvation (CPCM) in  $\text{CH}_2\text{Cl}_2$ . The contribution of the HOMO $\rightarrow$ LUMO electronic transition to the  $S_0$ -to- $S_1$  transition is shown, with the number in parentheses denoting the CI (configurational interaction) expansion coefficient.

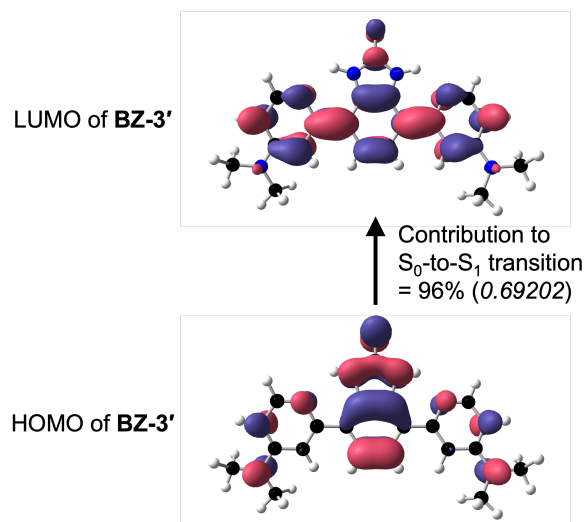

**Fig. S5.** Frontier molecular orbitals (FMOs) involved in the transition to the  $S_1$  excited state of **BZ-3'** calculated at the TD-B3LYP-D3/6-31G++G(d,p) level of theory with implicit solvation (CPCM) in  $\text{CH}_2\text{Cl}_2$ . The contribution of the HOMO→LUMO electronic transition to the  $S_0$ -to- $S_1$  transition is shown, with the number in parentheses denoting the CI (configurational interaction) expansion coefficient.

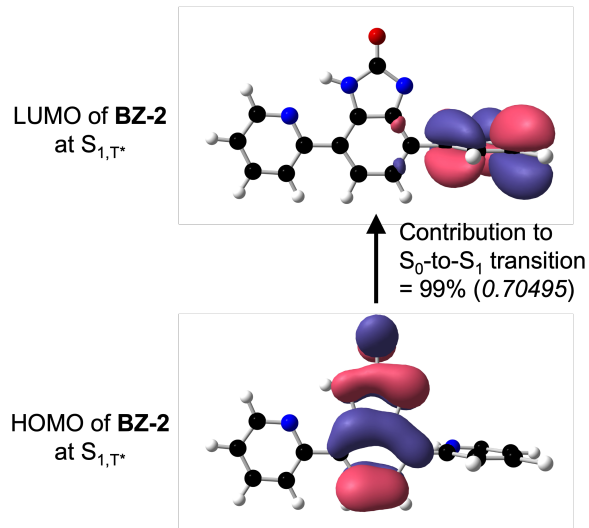

**Fig. S6.** Frontier molecular orbitals (FMOs) involved in the transition to the  $S_1$  excited state of **BZ-2** at  $T^*$  geometry calculated at the TD-B3LYP-D3/6-31G++G(d,p) level of theory with implicit solvation (CPCM) in  $\text{CH}_2\text{Cl}_2$ . The contribution of the HOMO→LUMO electronic transition to the  $S_0$ -to- $S_1$  transition is shown, with the number in parentheses denoting the CI (configurational interaction) expansion coefficient.

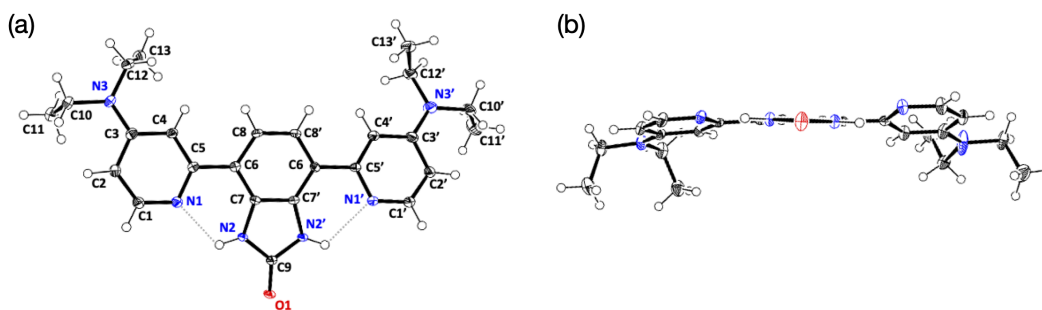

**Fig. S7.** X-ray structure of **BZ-3** as ORTEP diagrams with thermal ellipsoids at the 50% probability level: (a) face-on view; (b) edge-on view. Interatomic distances:  $N1 \cdots N2$ , 2.709(3) Å;  $N1' \cdots N2'$ , 2.809(2) Å. Dihedral angles:  $10.54^\circ$  ( $N1-C5-C6-C7$ );  $20.93^\circ$  ( $N1'-C5'-C6'-C7'$ ). One of the ethyl groups is disordered over two positions, for which only one is shown for clarity.

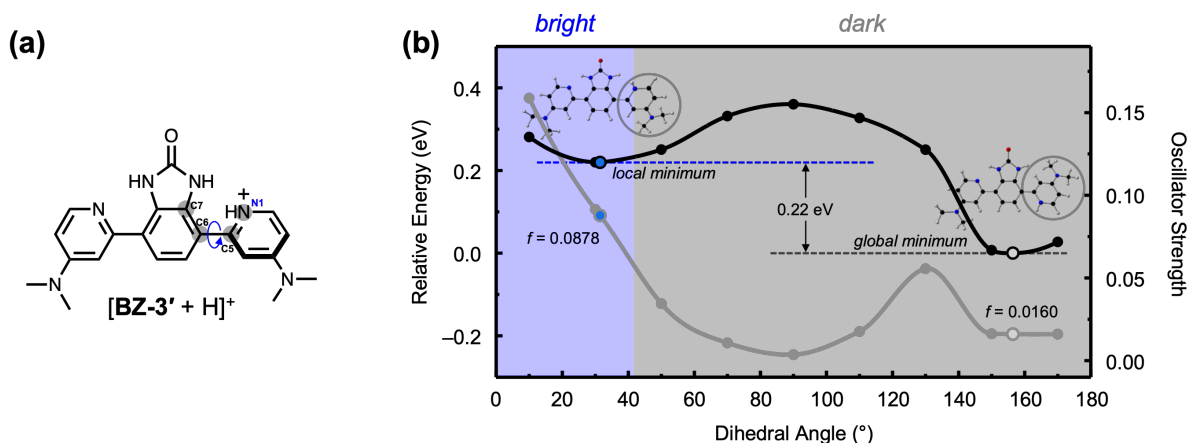

**Fig. S8.** (a) Chemical structure of the protonated DFT model **BZ-3'**. In scanning the dihedral angle, the C–C bond denoted with a blue arrow was rotated. (b) Potential energy curve (black line) and oscillator strength ( $f$ ; gray line) of **BZ-3'** at the  $S_1$  state, constructed at the TD-B3LYP-D3/6-31++G(d,p) level of theory with implicit solvation (CPCM) in  $CH_2Cl_2$ , by a relaxed scan along the fixed  $C7-C6-C5-N1$  dihedral angle (step =  $20^\circ$ ). Blue and gray lined circles indicate stationary points with optimized geometries shown next. Blue and gray shades indicate bright ( $f > 0.06$ ) and dark ( $f < 0.06$ ) regions, respectively.

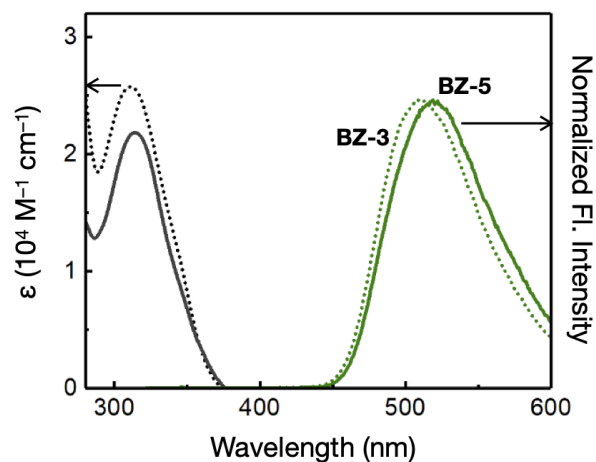

**Fig. S9.** Absorption and normalized emission spectra of **BZ-5** (solid lines) and **BZ-3** (dotted lines) in  $\text{CH}_2\text{Cl}_2$ .  $T = 298$  K.

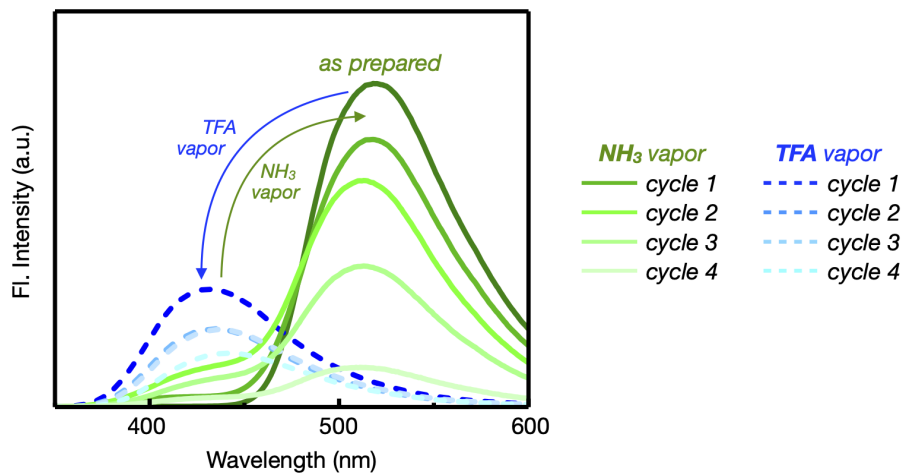

**Fig. S10.** Emission spectra ( $\lambda_{\text{exc}} = 310$  nm) of the **BZ-5**-doped (10 wt%) PMMA film obtained during alternative cycles of exposure to saturated TFA (1 min) and  $\text{NH}_3$  (5 min) repeated under ambient conditions.



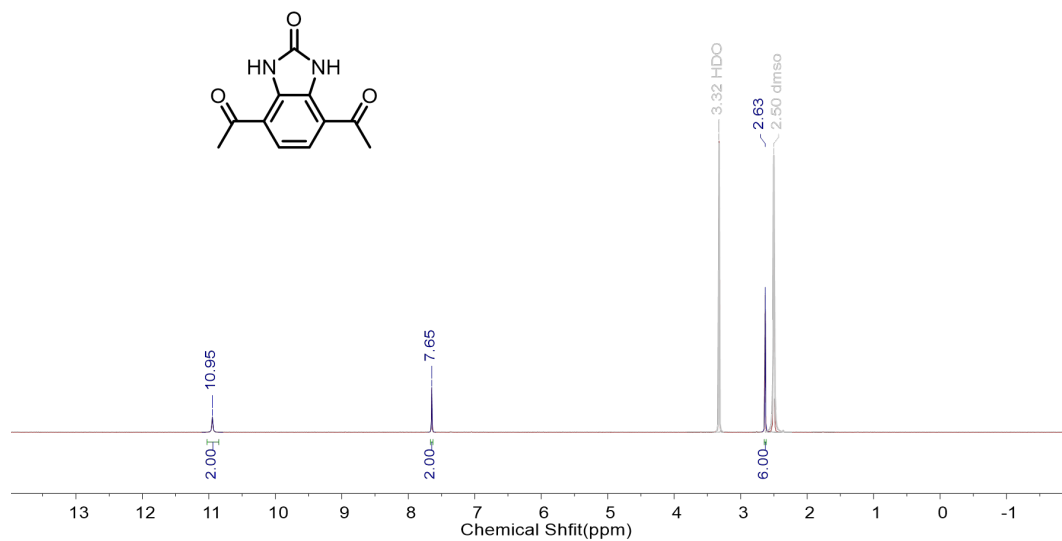

**Figure S11.**  $^1\text{H}$  NMR (500 MHz) spectrum of **BZ-1** in  $\text{DMSO-}d_6$  ( $T = 298$  K).

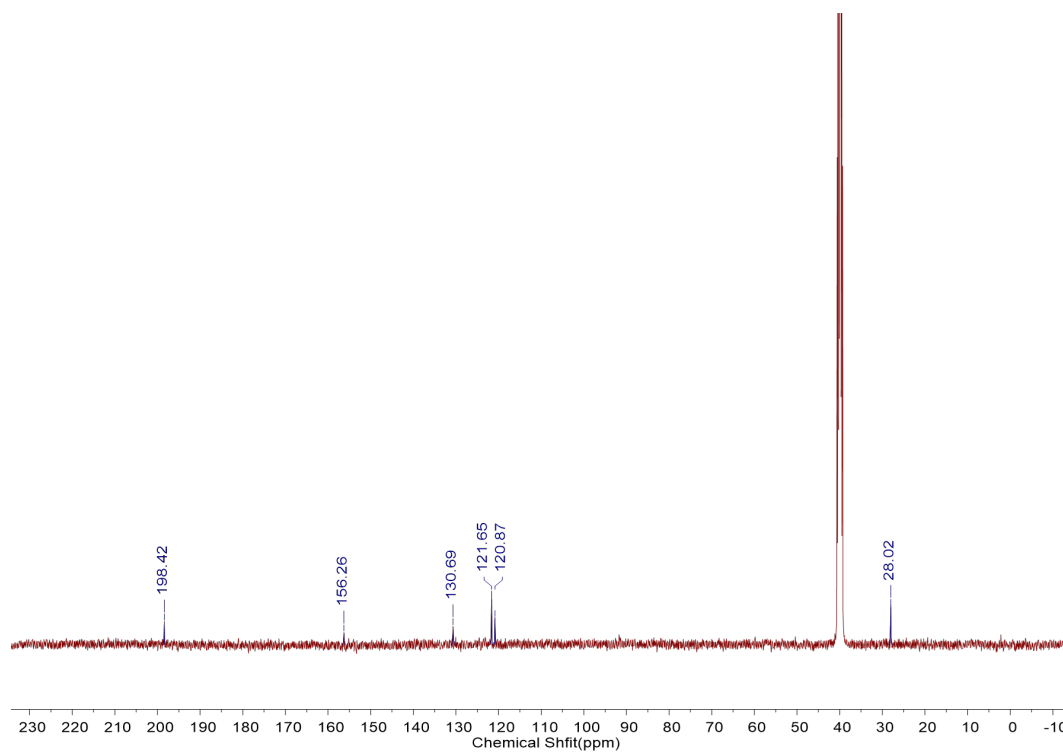

**Figure S12.**  $^{13}\text{C}$  NMR (100 MHz) spectrum of **BZ-1** in  $\text{DMSO-}d_6$  ( $T = 298$  K).

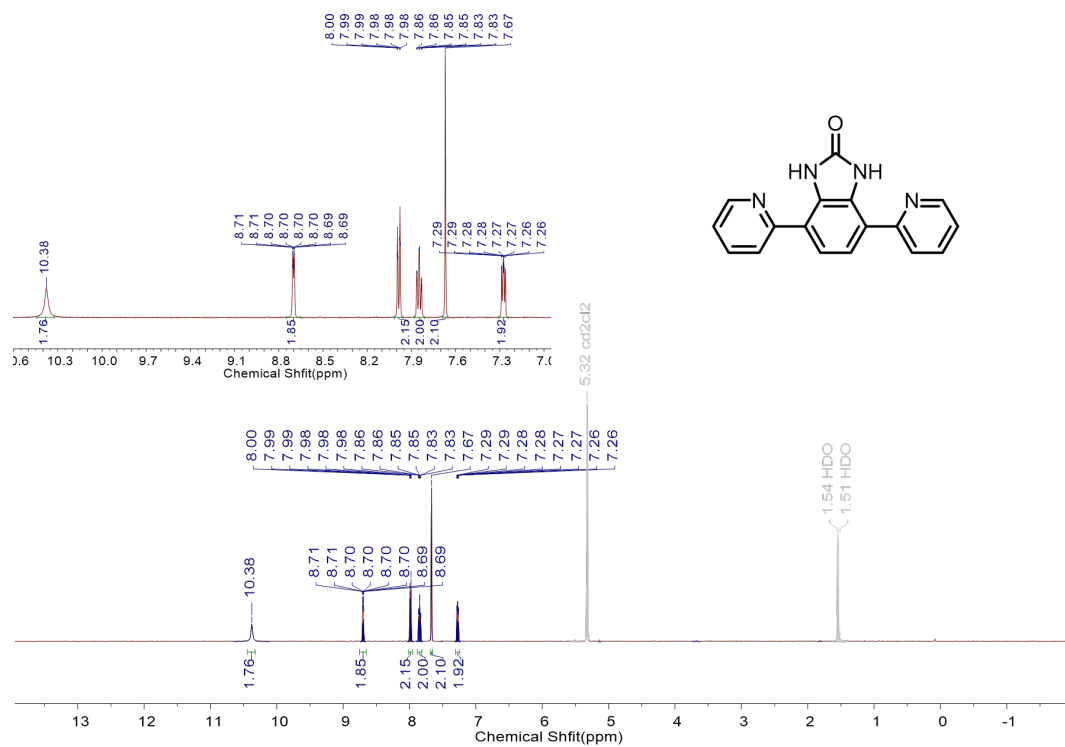

Figure S13.  $^1\text{H}$  NMR (500 MHz) spectrum of **BZ-2** in  $\text{CD}_2\text{Cl}_2$  ( $T = 298\text{ K}$ ).

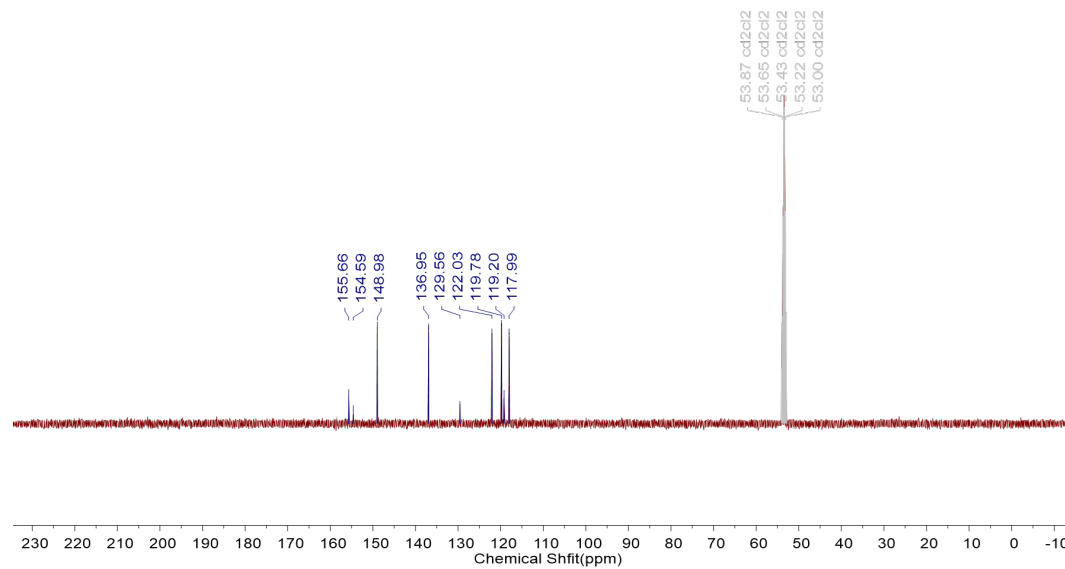

Figure S14.  $^{13}\text{C}$  NMR (125 MHz) spectrum of **BZ-2** in  $\text{CD}_2\text{Cl}_2$  ( $T = 298\text{ K}$ ).

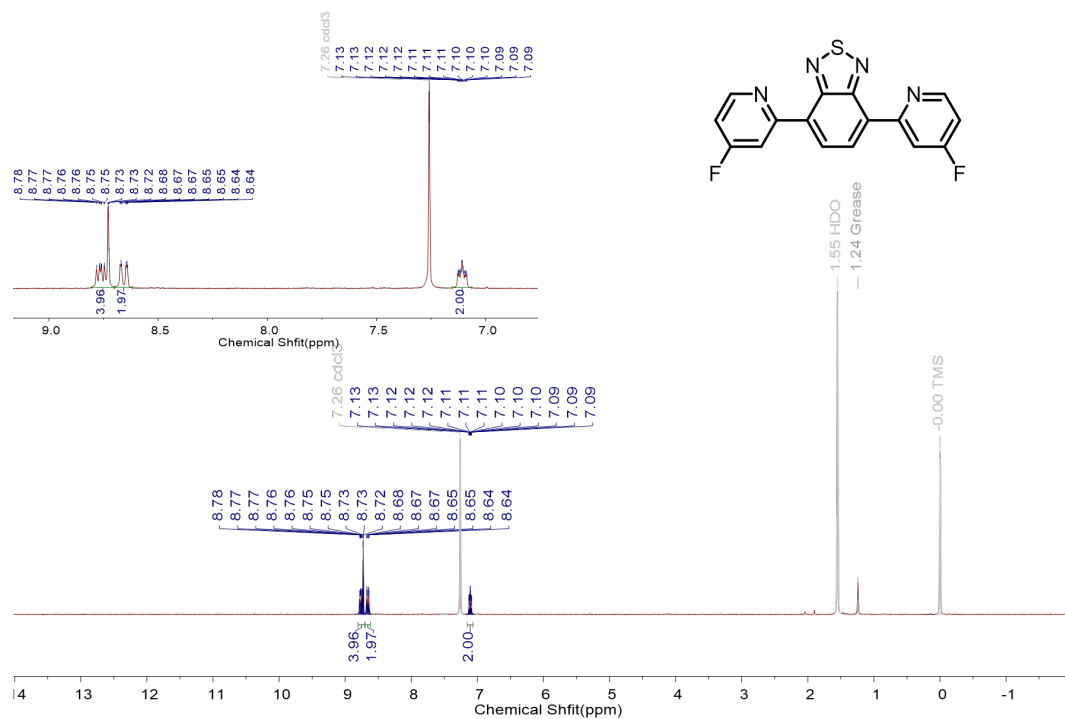

**Figure S15.** <sup>1</sup>H NMR (400 MHz) spectrum of **2** in CDCl<sub>3</sub> (*T* = 298 K).

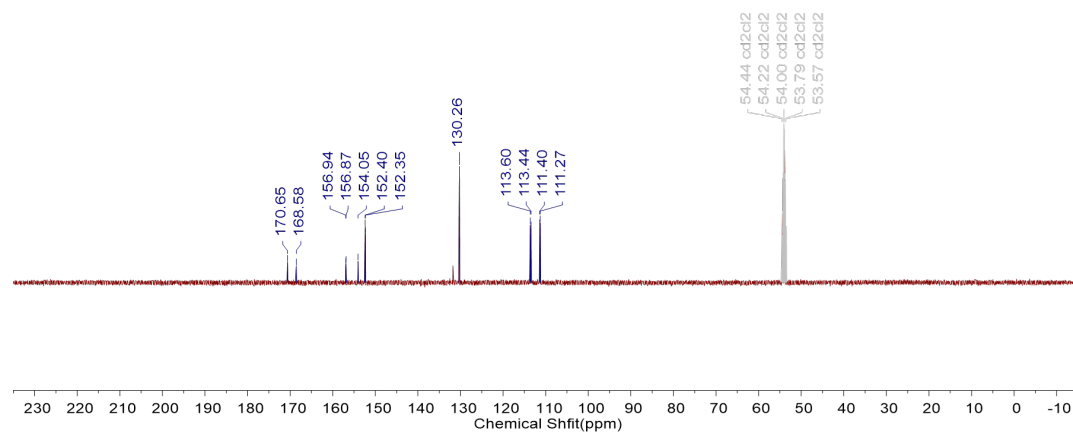

**Figure S16.** <sup>13</sup>C NMR (125 MHz) spectrum of **2** in CD<sub>2</sub>Cl<sub>2</sub> (*T* = 298 K).

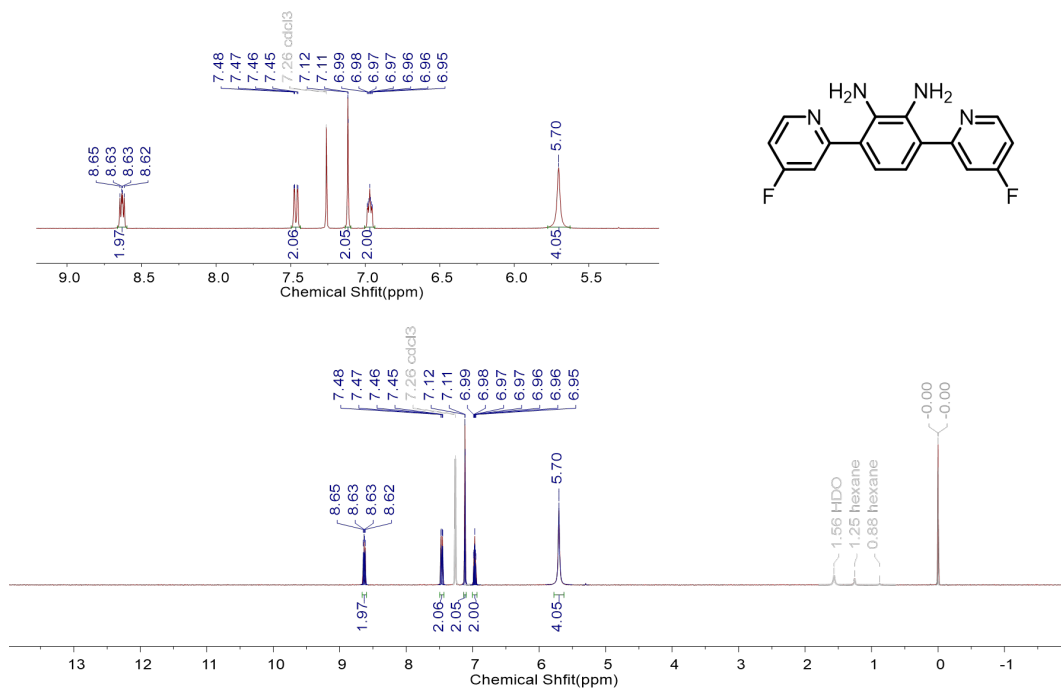

Figure S17.  $^1\text{H}$  NMR (500 MHz) spectrum of **3** in  $\text{CDCl}_3$  ( $T = 298\text{ K}$ ).

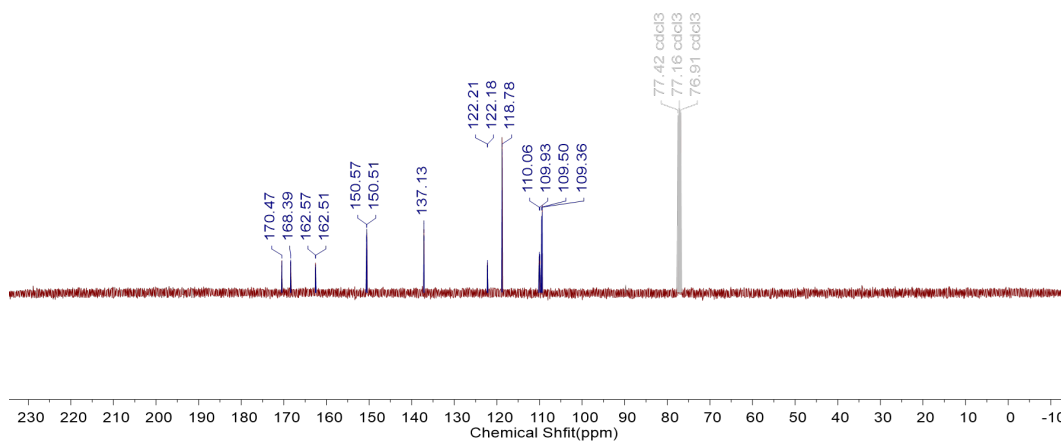

Figure S18.  $^{13}\text{C}$  NMR (125 MHz) spectrum of **3** in  $\text{CDCl}_3$  ( $T = 298\text{ K}$ ).

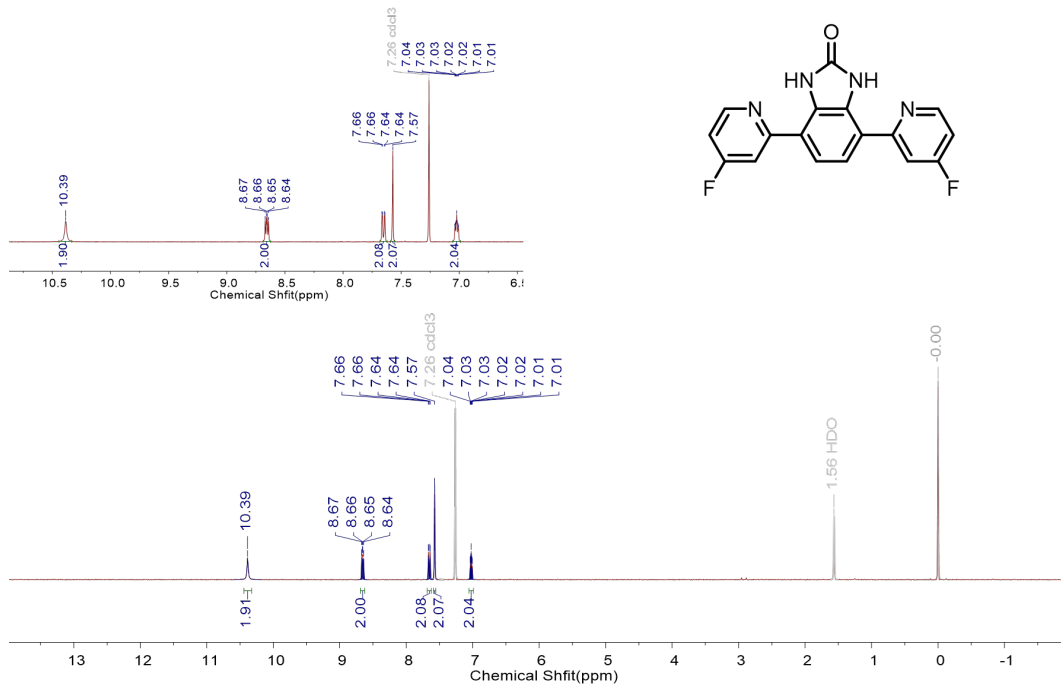

Figure S19.  $^1\text{H}$  NMR (500 MHz) spectrum of **4** in  $\text{CDCl}_3$  ( $T = 298\text{ K}$ ).

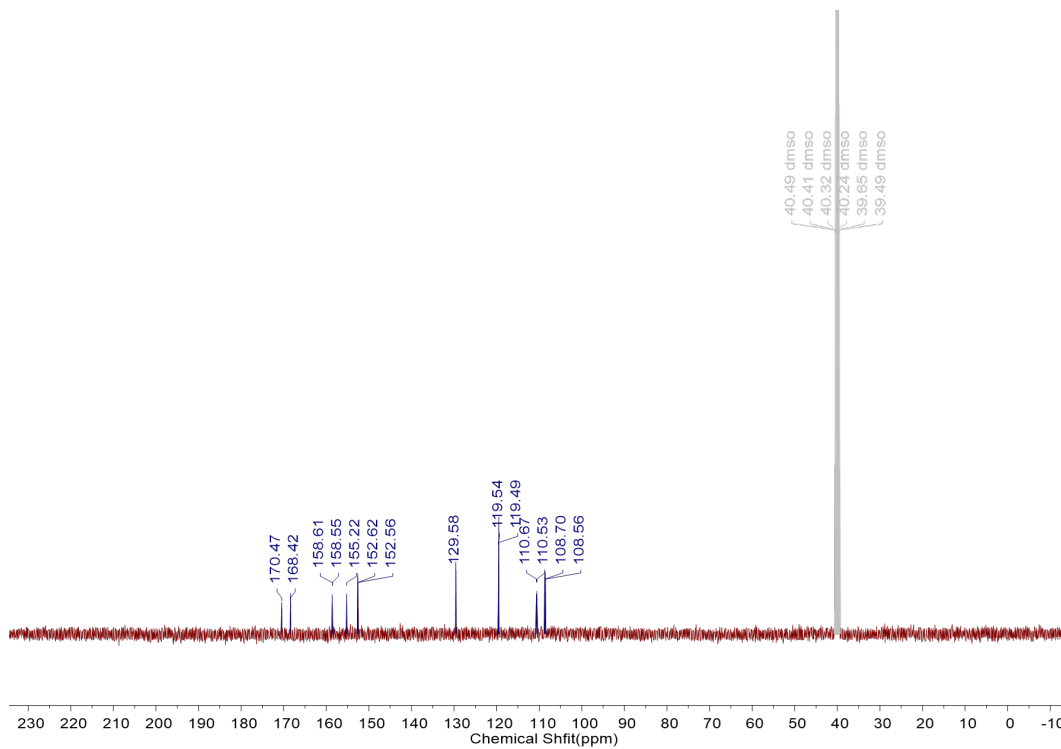

Figure S20.  $^{13}\text{C}$  NMR (125 MHz) spectrum of **4** in  $\text{DMSO}-d_6$  ( $T = 298\text{ K}$ ).

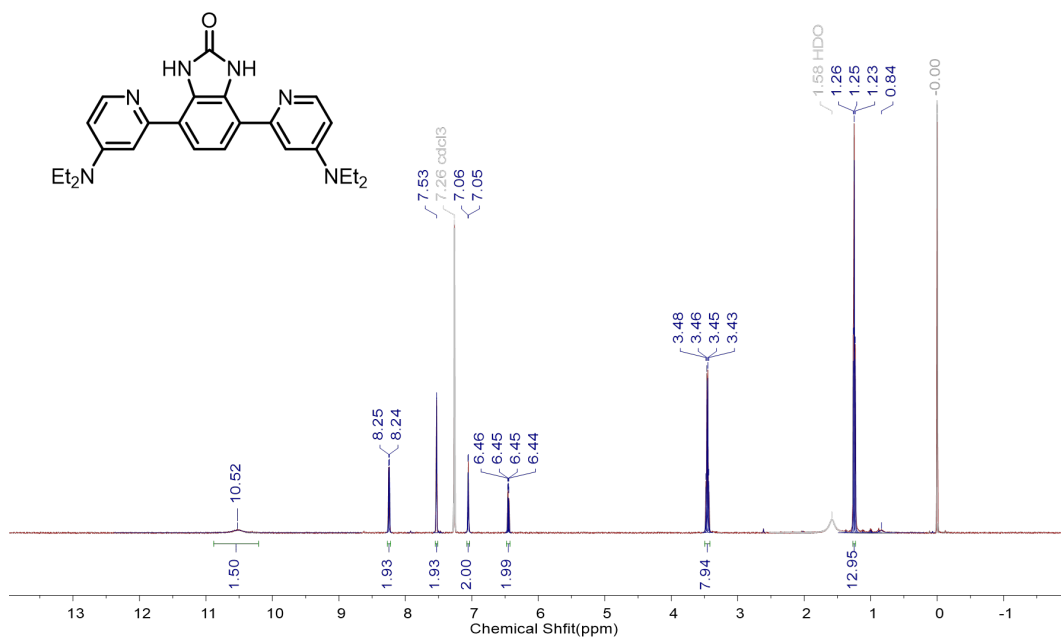

**Figure S21.**  $^1\text{H}$  NMR (500 MHz) spectrum of **BZ-3** in  $\text{CDCl}_3$  ( $T = 298$  K).

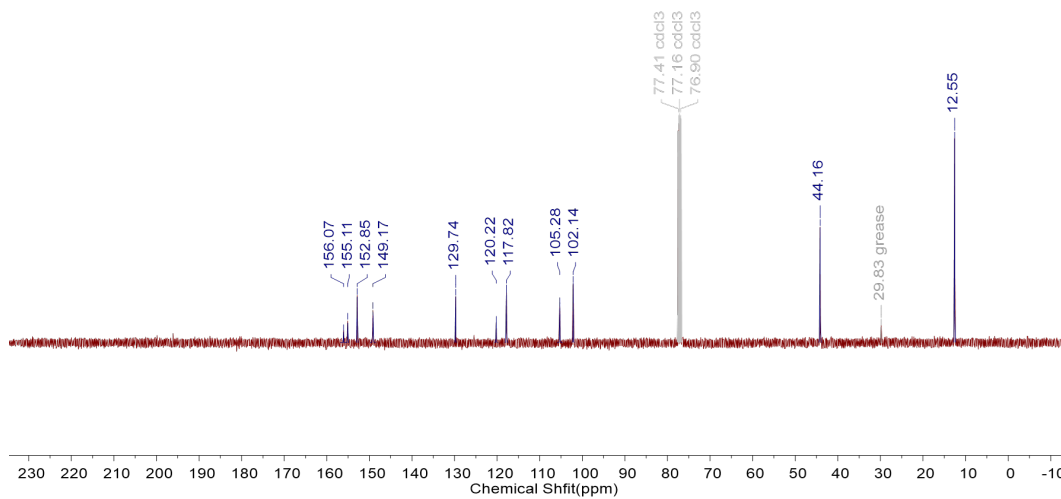

**Figure S22.**  $^{13}\text{C}$  NMR (125 MHz) spectrum of **BZ-3** in  $\text{CDCl}_3$  ( $T = 298$  K).

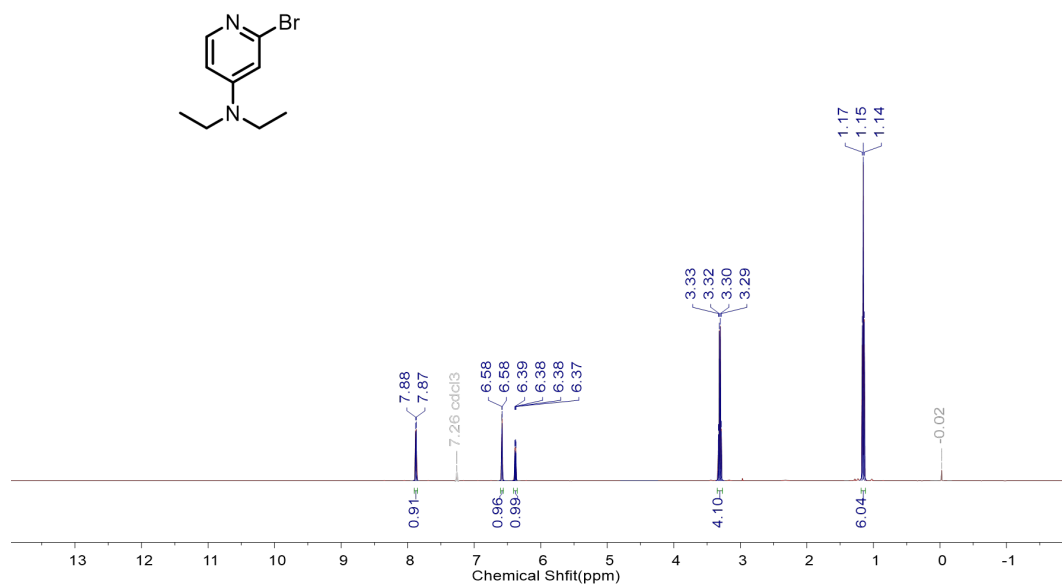

**Figure S23.**  $^1\text{H}$  NMR (500 MHz) spectrum of **6** in  $\text{CDCl}_3$  ( $T = 298$  K).

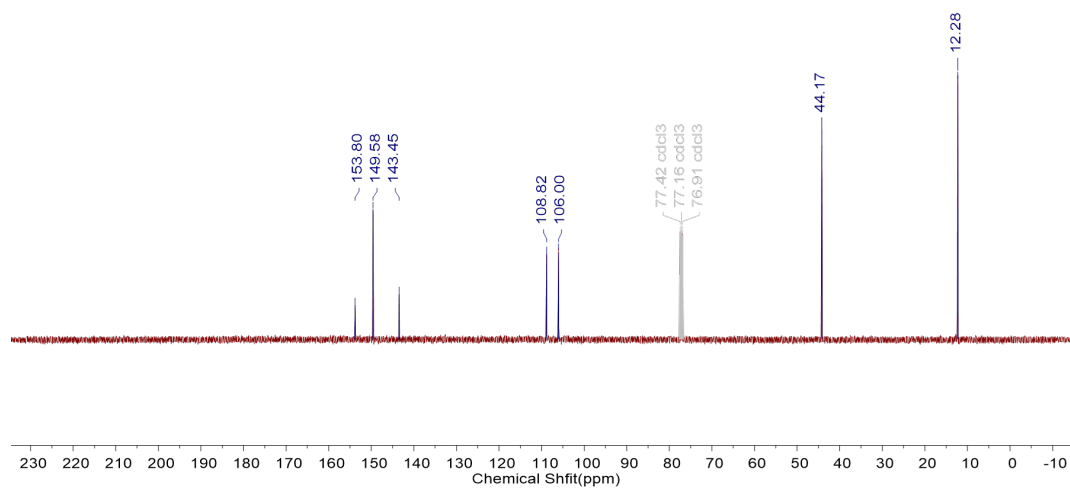

**Figure S24.**  $^{13}\text{C}$  NMR (125 MHz) spectrum of **6** in  $\text{CDCl}_3$  ( $T = 298$  K).

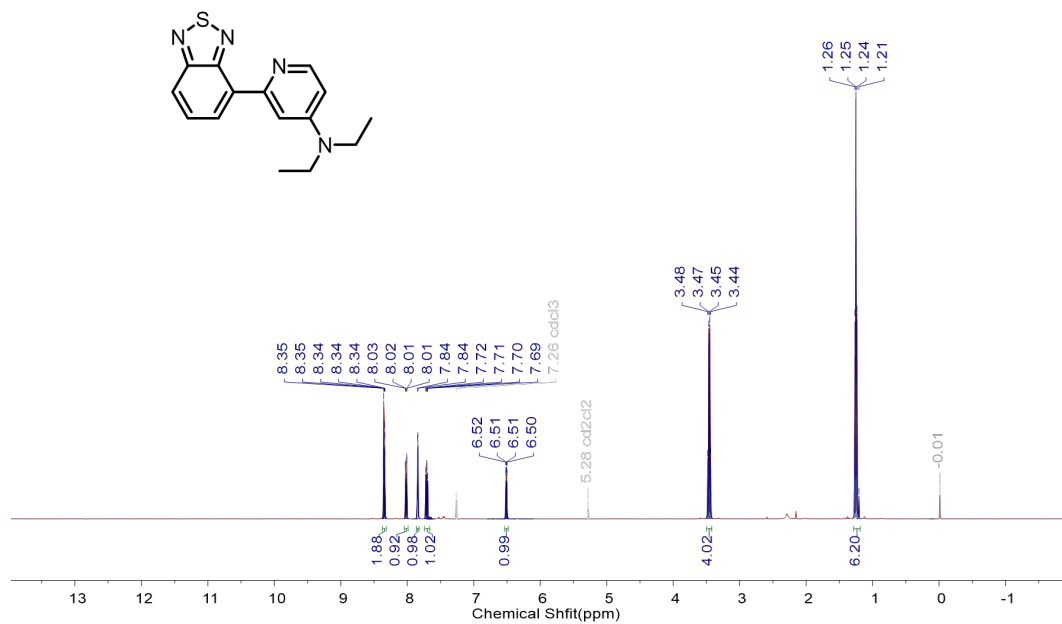

**Figure S25.**  $^1\text{H}$  NMR (500 MHz) spectrum of **7** in  $\text{CDCl}_3$  ( $T = 298$  K).

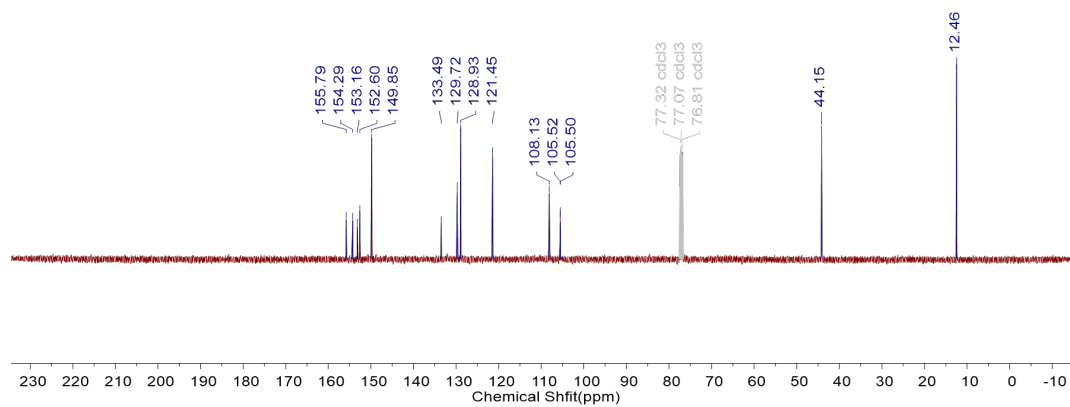

**Figure S26.**  $^{13}\text{C}$  NMR (125 MHz) spectrum of **7** in  $\text{CDCl}_3$  ( $T = 298$  K).



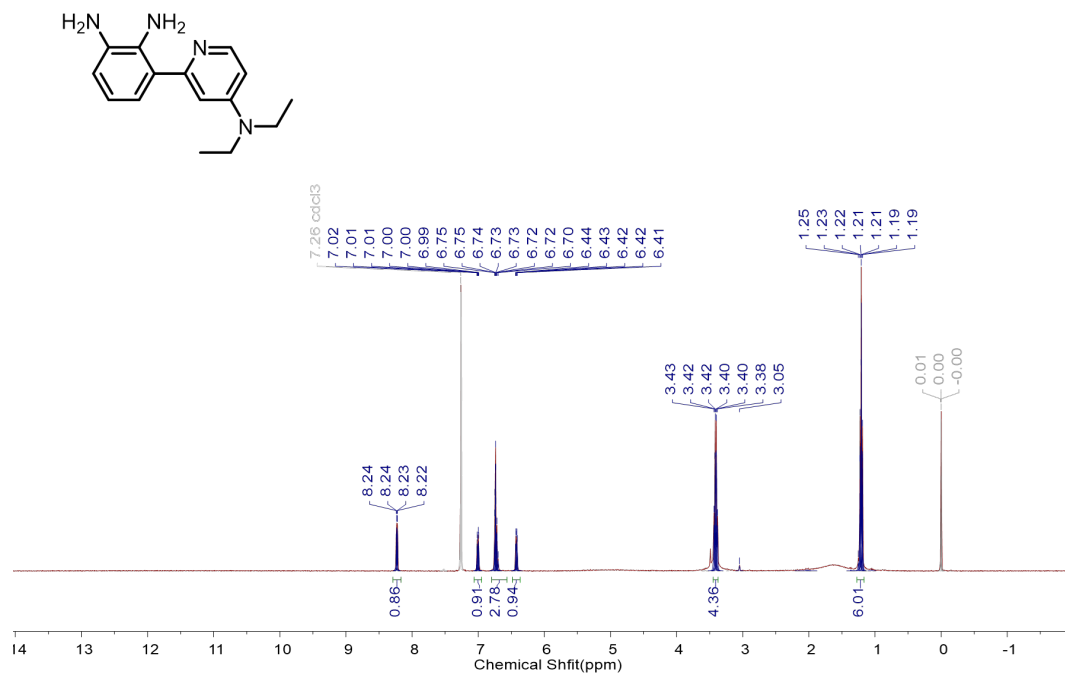

**Figure S27.** <sup>1</sup>H NMR (400 MHz) spectrum of **8** in CDCl<sub>3</sub> (*T* = 298 K).

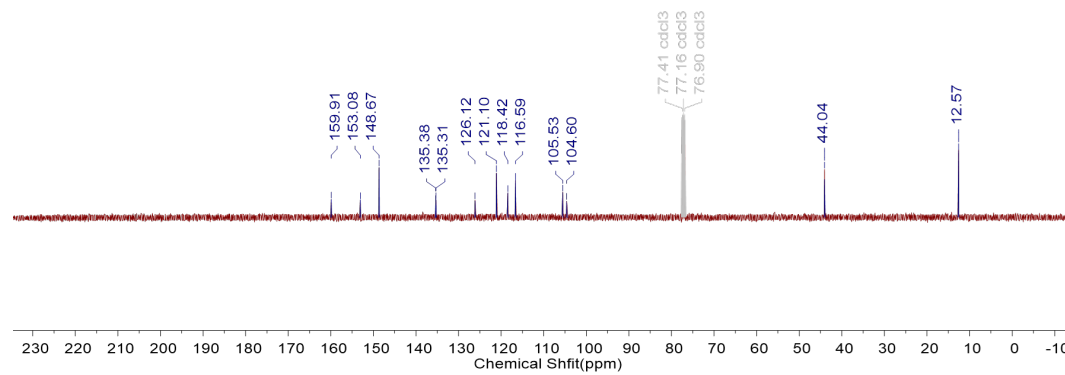

**Figure S28.** <sup>13</sup>C NMR (125 MHz) spectrum of **8** in CDCl<sub>3</sub> (*T* = 298 K).

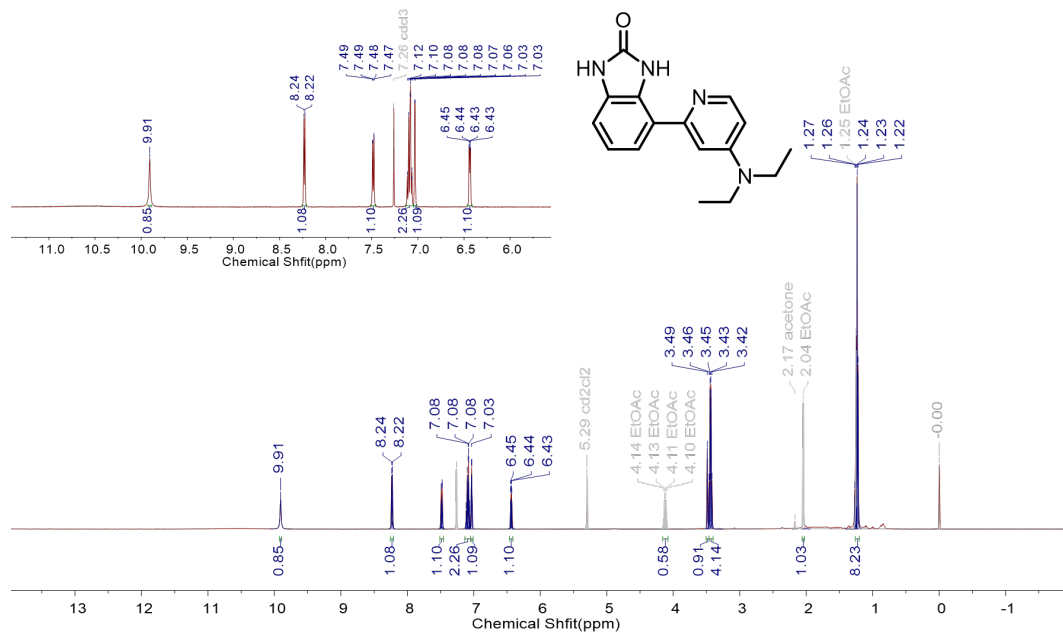

Figure S29.  $^1\text{H}$  NMR (500 MHz) spectrum of **BZ-4** in  $\text{CDCl}_3$  ( $T = 298\text{ K}$ ).

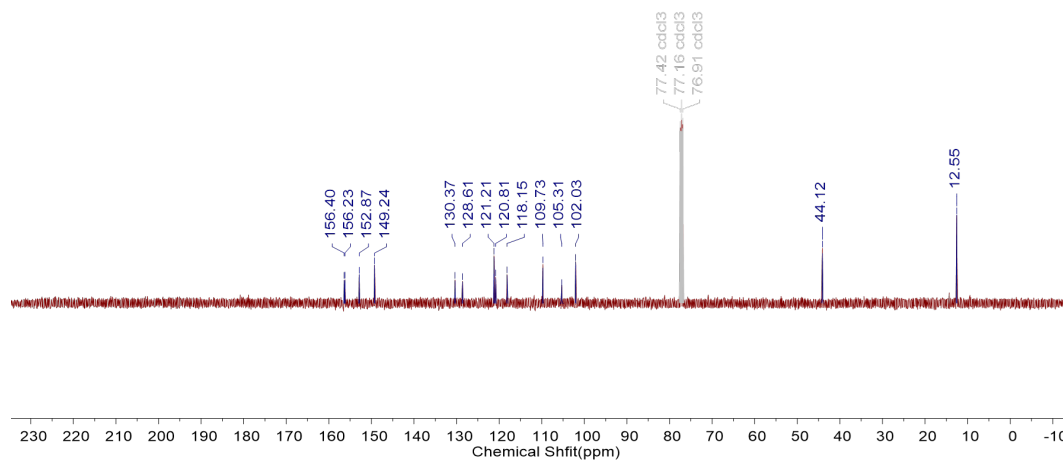

Figure S30.  $^{13}\text{C}$  NMR (125 MHz) spectrum of **BZ-4** in  $\text{CDCl}_3$  ( $T = 298\text{ K}$ ).

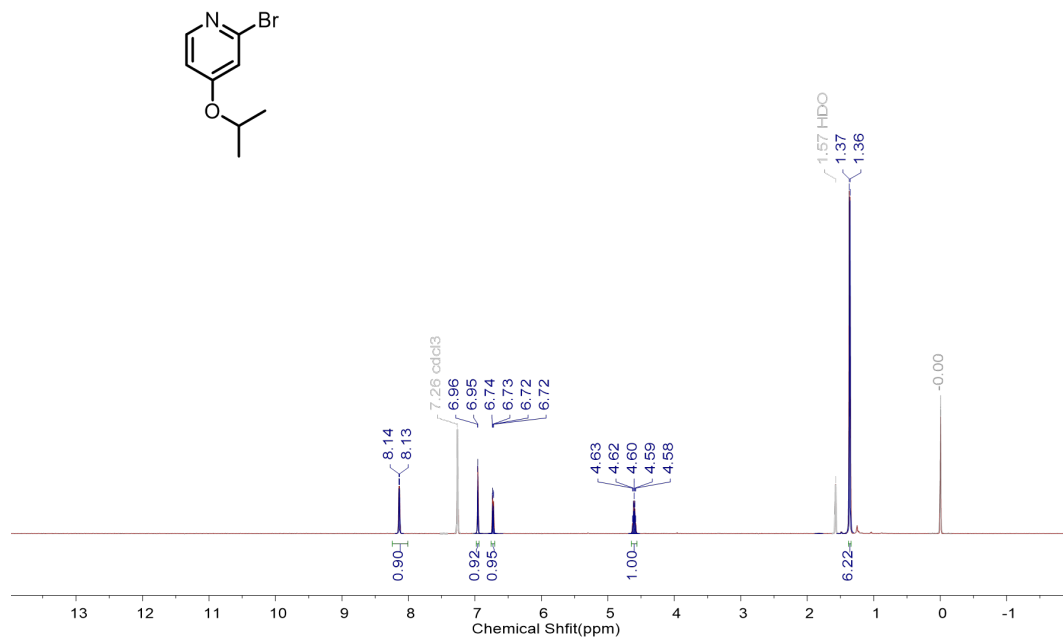

**Figure S31.** <sup>1</sup>H NMR (500 MHz) spectrum of **9** in CDCl<sub>3</sub> (*T* = 298 K).

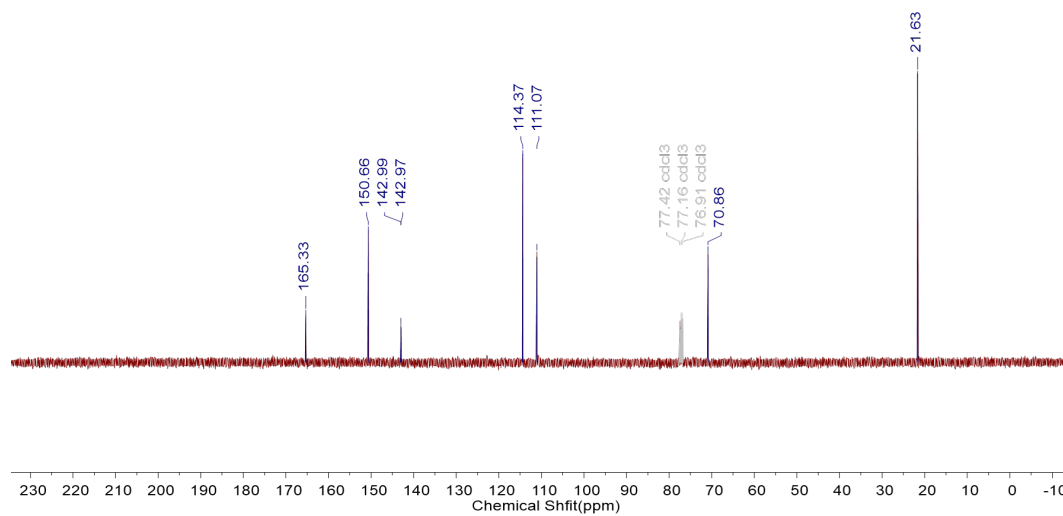

**Figure S32.** <sup>13</sup>C NMR (125 MHz) spectrum of **9** in CDCl<sub>3</sub> (*T* = 298 K).

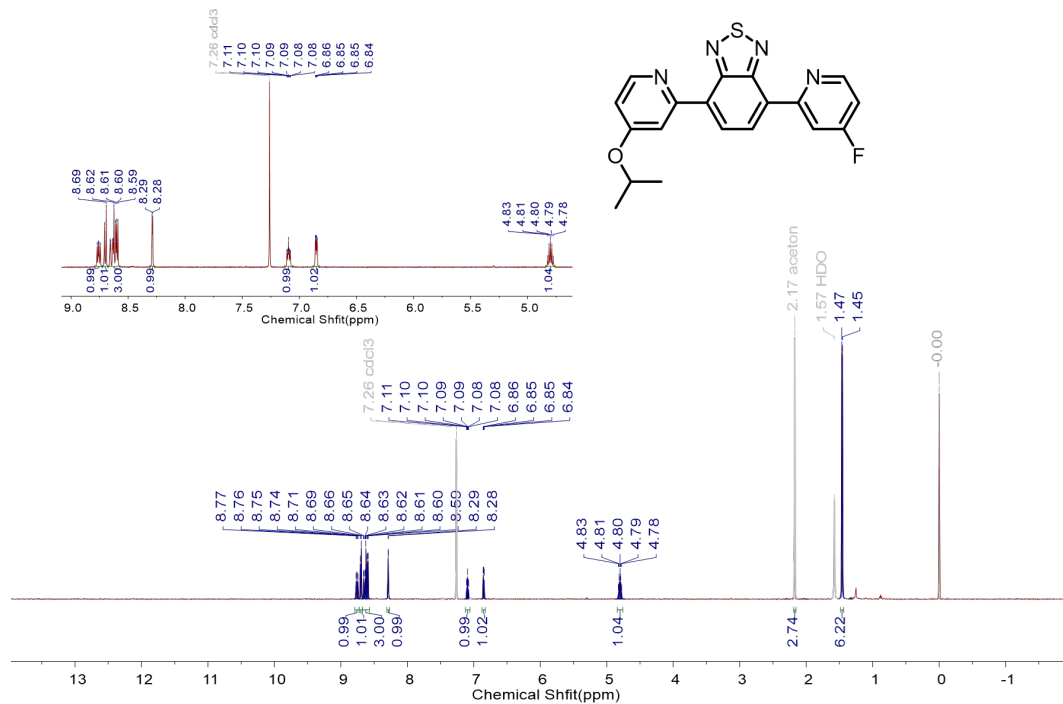

Figure S33. <sup>1</sup>H NMR (500 MHz) spectrum of **10** in CDCl<sub>3</sub> (*T* = 298 K).

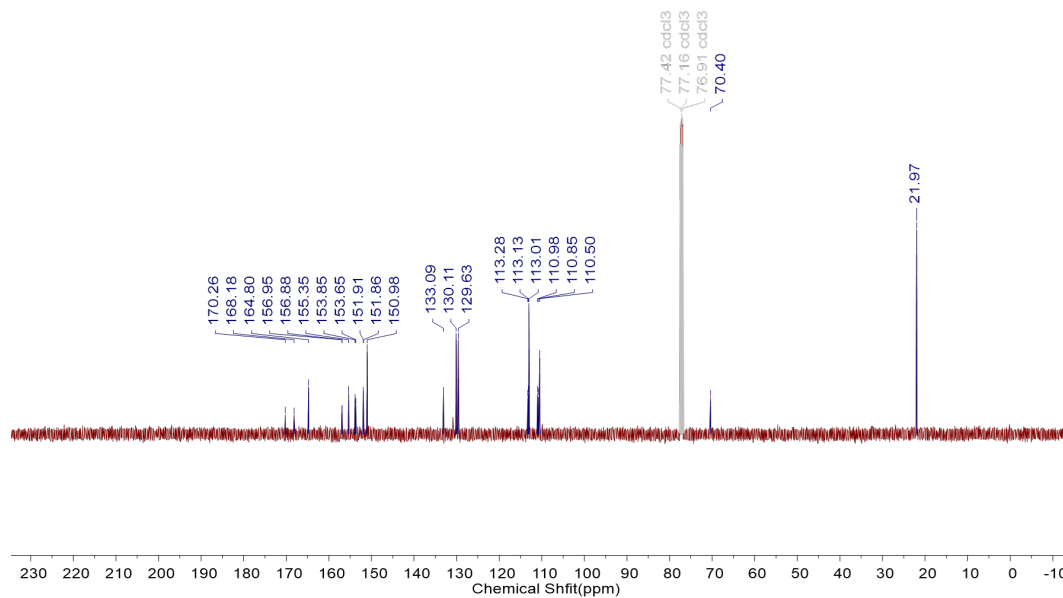

Figure S34. <sup>13</sup>C NMR (125 MHz) spectrum of **10** in CDCl<sub>3</sub> (*T* = 298 K).

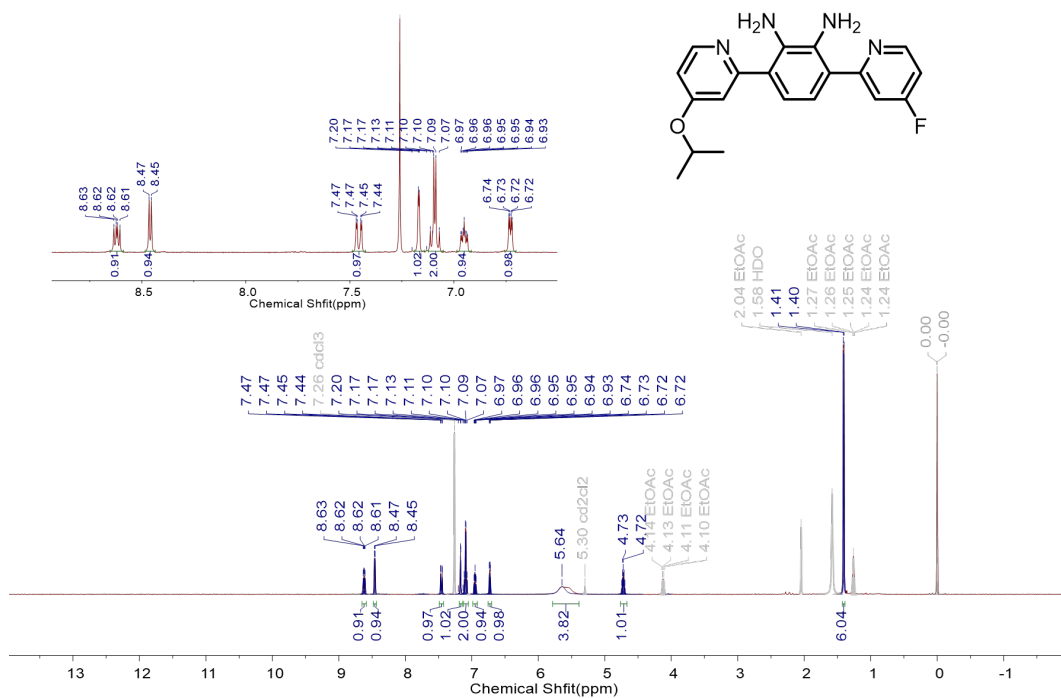

Figure S35. <sup>1</sup>H NMR (500 MHz) spectrum of **11** in CDCl<sub>3</sub> (*T* = 298 K).

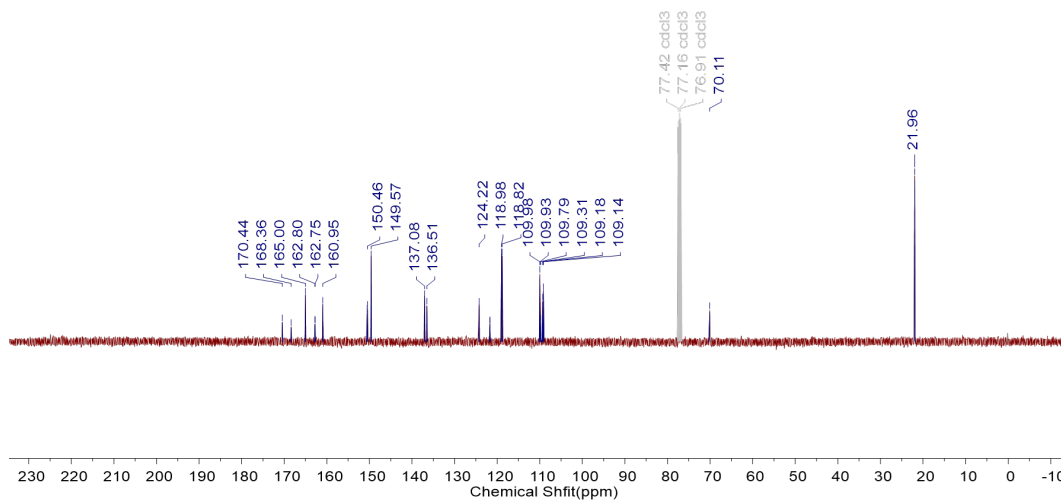

Figure S36. <sup>13</sup>C NMR (125 MHz) spectrum of **11** in CDCl<sub>3</sub> (*T* = 298 K).

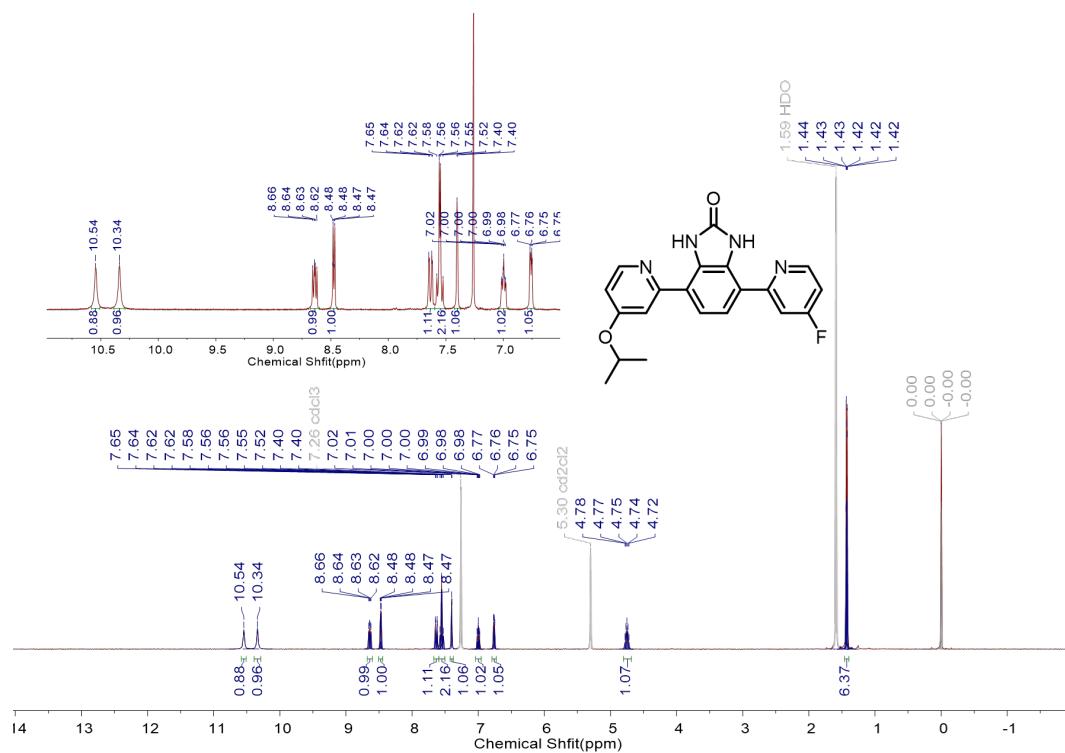

Figure S37. <sup>1</sup>H NMR (400 MHz) spectrum of **12** in CDCl<sub>3</sub> (*T* = 298 K).

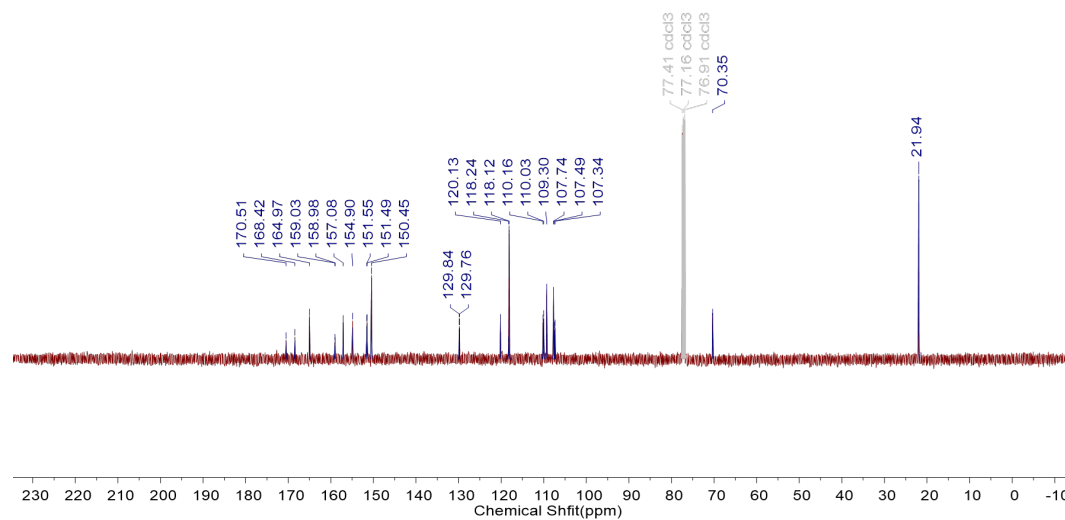

Figure S38. <sup>13</sup>C NMR (125 MHz) spectrum of **12** in CDCl<sub>3</sub> (*T* = 298 K).

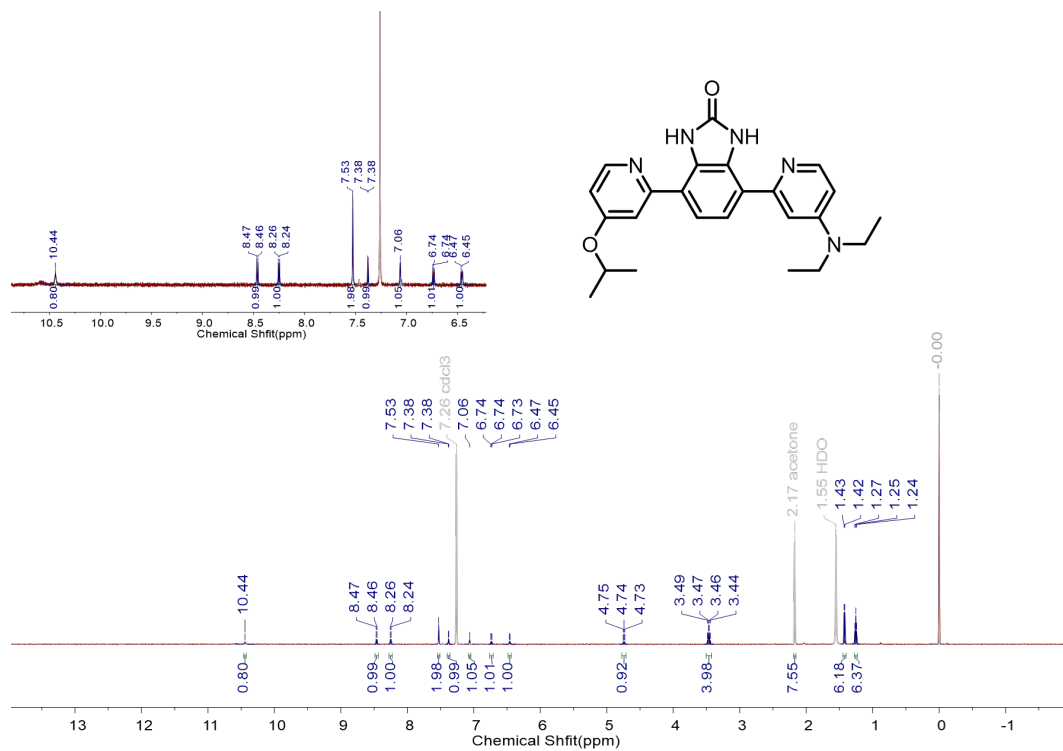

Figure S39.  $^1\text{H}$  NMR (500 MHz) spectrum of **BZ-5** in  $\text{CDCl}_3$  ( $T = 298\text{ K}$ ).

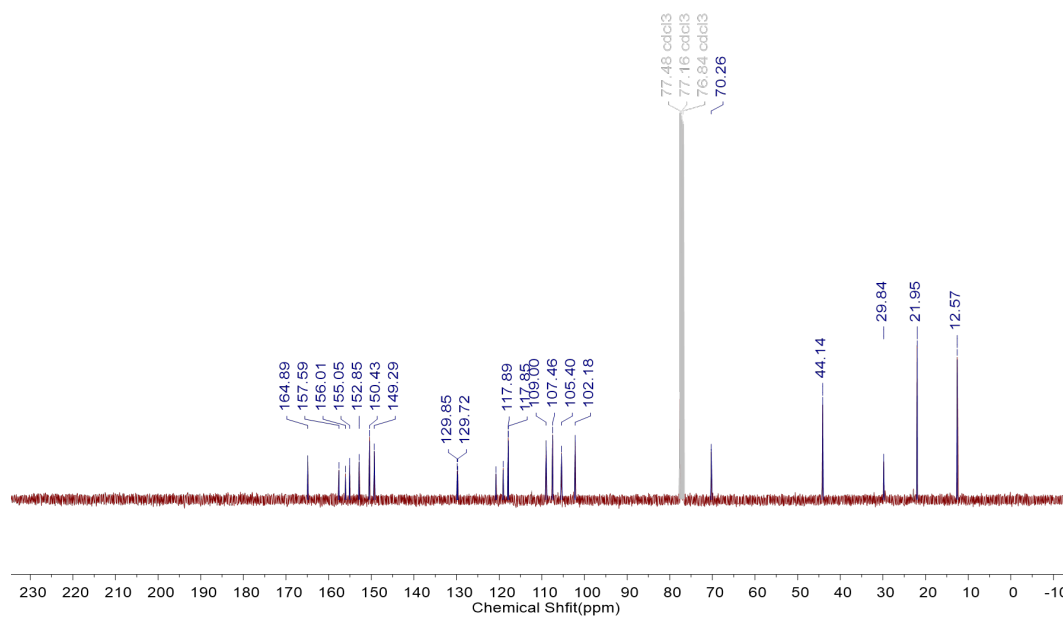

Figure S40.  $^{13}\text{C}$  NMR (125 MHz) spectrum of **BZ-5** in  $\text{CDCl}_3$  ( $T = 298\text{ K}$ ).

**Table S4.** Cartesian coordinates of the optimized geometry of **BZ-1** at  $S_{1,N^*}$ . $E(\text{TD-HF}/\text{TD-DFT}) = -760.404690967$  Hartree

| Atom | x        | y         | z         | Atom | x         | y         | z         |
|------|----------|-----------|-----------|------|-----------|-----------|-----------|
| C    | 0.000000 | 0.707656  | 0.420371  | C    | 0.000000  | -2.945909 | -0.723641 |
| C    | 0.000000 | 1.493011  | -0.776077 | O    | 0.000000  | -3.533421 | 0.390642  |
| C    | 0.000000 | 0.713092  | -1.941239 | C    | 0.000000  | -3.736776 | -2.013485 |
| C    | 0.000000 | -0.713092 | -1.941239 | H    | 0.000000  | 1.204084  | -2.908090 |
| C    | 0.000000 | -1.493011 | -0.776077 | H    | 0.000000  | -1.204084 | -2.908090 |
| C    | 0.000000 | -0.707656 | 0.420371  | H    | 0.000000  | -2.083104 | 2.000945  |
| N    | 0.000000 | -1.105607 | 1.723852  | H    | 0.000000  | 2.083104  | 2.000945  |
| C    | 0.000000 | 0.000000  | 2.577855  | H    | 0.883254  | 3.510618  | -2.623077 |
| N    | 0.000000 | 1.105607  | 1.723852  | H    | -0.883254 | 3.510618  | -2.623077 |
| O    | 0.000000 | 0.000000  | 3.801454  | H    | 0.000000  | 4.801265  | -1.773761 |
| C    | 0.000000 | 2.945909  | -0.723641 | H    | 0.883254  | -3.510618 | -2.623077 |
| C    | 0.000000 | 3.736776  | -2.013485 | H    | 0.000000  | -4.801265 | -1.773761 |
| O    | 0.000000 | 3.533421  | 0.390642  | H    | -0.883254 | -3.510618 | -2.623077 |

**Table S5.** Cartesian coordinates of the optimized geometry of **BZ-1** at  $S_{1,T^*}$ . $E(\text{TD-HF}/\text{TD-DFT}) = -760.398736993$  Hartree

| Atom | x         | y         | z         | Atom | x         | y         | z         |
|------|-----------|-----------|-----------|------|-----------|-----------|-----------|
| C    | 0.723484  | 0.454511  | -0.001244 | C    | -2.844333 | -0.834961 | -0.006918 |
| C    | 1.537120  | -0.721028 | 0.000278  | O    | -3.511343 | 0.322566  | 0.004862  |
| C    | 0.821089  | -1.920054 | 0.001456  | C    | -3.718320 | -2.036375 | 0.000972  |
| C    | -0.600584 | -1.970064 | -0.000410 | H    | 1.350036  | -2.865769 | 0.003966  |
| C    | -1.414249 | -0.817938 | -0.005412 | H    | -1.058121 | -2.952482 | 0.004606  |
| C    | -0.704753 | 0.414373  | -0.003390 | H    | -2.868896 | 1.095695  | 0.007168  |
| N    | -1.232189 | 1.664961  | -0.002578 | H    | 1.983545  | 2.129765  | 0.001946  |
| C    | -0.171446 | 2.538215  | 0.000092  | H    | 3.617661  | -2.499858 | 0.884821  |
| N    | 1.039147  | 1.763322  | 0.000151  | H    | 3.617549  | -2.500503 | -0.882238 |
| O    | -0.173003 | 3.770551  | 0.002058  | H    | 4.891139  | -1.620224 | 0.000897  |
| C    | 3.006157  | -0.624831 | 0.000547  | H    | -4.258040 | -2.104693 | 0.955845  |
| C    | 3.834447  | -1.889743 | 0.001056  | H    | -4.475351 | -1.946463 | -0.787409 |
| O    | 3.547820  | 0.491656  | -0.000140 | H    | -3.167689 | -2.964267 | -0.149019 |



**Table S6.** Cartesian coordinates of the optimized geometry of **BZ-2** at  $S_{1,N^*}$ . $E(\text{TD-HF}/\text{TD-DFT}) = -949.307139839$  Hartree

| Atom | x         | y         | z         | Atom | x         | y         | z         |
|------|-----------|-----------|-----------|------|-----------|-----------|-----------|
| C    | 0.000085  | -0.711779 | 0.507431  | C    | 0.000003  | -5.730707 | -0.427888 |
| C    | -0.000041 | 0.710996  | -1.839634 | N    | 0.000307  | -3.543491 | 0.597670  |
| C    | 0.000110  | -1.509028 | -0.683993 | C    | -0.000270 | -3.759230 | -1.819546 |
| C    | -0.000085 | 0.711779  | 0.507431  | C    | -0.000339 | -5.138716 | -1.707330 |
| C    | -0.000110 | 1.509028  | -0.683993 | C    | 0.000273  | -4.878334 | 0.677398  |
| C    | 0.000041  | -0.710996 | -1.839634 | H    | -0.000046 | 1.186713  | -2.813659 |
| N    | -0.000169 | 1.104075  | 1.811488  | H    | 0.000046  | -1.186713 | -2.813659 |
| C    | 0.000000  | 0.000000  | 2.664345  | H    | 0.000040  | 2.098565  | 2.049889  |
| N    | 0.000169  | -1.104075 | 1.811488  | H    | -0.000040 | -2.098565 | 2.049889  |
| O    | 0.000000  | 0.000000  | 3.890184  | H    | 0.000030  | 6.806940  | -0.296479 |
| C    | 0.000000  | 2.956817  | -0.646388 | H    | 0.000414  | 3.301554  | -2.802284 |
| C    | -0.000003 | 5.730707  | -0.427888 | H    | -0.000568 | 5.289875  | 1.685161  |
| C    | 0.000270  | 3.759230  | -1.819546 | H    | -0.000030 | -6.806940 | -0.296479 |
| N    | -0.000307 | 3.543491  | 0.597670  | H    | -0.000414 | -3.301554 | -2.802284 |
| C    | -0.000273 | 4.878334  | 0.677398  | H    | 0.000568  | -5.289875 | 1.685161  |
| C    | 0.000339  | 5.138716  | -1.707330 | H    | -0.000567 | -5.755812 | -2.600803 |
| C    | 0.000000  | -2.956817 | -0.646388 | H    | 0.000567  | 5.755812  | -2.600803 |

**Table S7.** Cartesian coordinates of the optimized geometry of **BZ-2** at  $S_{1,T^*}$ . $E(\text{TD-HF}/\text{TD-DFT}) = -949.326868619$  Hartree

| Atom | x         | y         | z         | Atom | x         | y         | z         |
|------|-----------|-----------|-----------|------|-----------|-----------|-----------|
| C    | -0.754912 | 0.574002  | 0.034979  | C    | -5.732071 | -0.506576 | -0.051263 |
| C    | 0.716970  | -1.769469 | 0.091396  | N    | -3.579382 | 0.568638  | 0.040368  |
| C    | -1.489437 | -0.629583 | 0.033837  | C    | -3.721162 | -1.827708 | -0.073883 |
| C    | 0.695979  | 0.615195  | 0.063125  | C    | -5.111474 | -1.756858 | -0.097997 |
| C    | 1.445272  | -0.596356 | 0.096935  | C    | -4.917492 | 0.623780  | 0.015003  |
| C    | -0.705683 | -1.787140 | 0.068867  | H    | 1.241522  | -2.718870 | 0.114200  |
| N    | 1.148135  | 1.874196  | 0.048721  | H    | -1.184287 | -2.758616 | 0.086814  |
| C    | 0.012594  | 2.687351  | 0.019871  | H    | 2.987448  | -0.520153 | -1.986782 |
| N    | -1.141680 | 1.870527  | 0.012971  | H    | -2.113550 | 2.160005  | 0.014044  |
| O    | -0.015822 | 3.915530  | 0.005021  | H    | 6.797155  | -0.592082 | -0.255242 |
| C    | 2.932558  | -0.578706 | 0.100800  | H    | 3.204373  | -0.702922 | 2.186905  |
| C    | 5.718670  | -0.576995 | -0.138765 | H    | 5.340006  | -0.473176 | -2.270338 |
| C    | 3.706087  | -0.640476 | 1.227146  | H    | -6.811849 | -0.406983 | -0.068457 |
| N    | 3.551739  | -0.467484 | -1.153497 | H    | -3.234930 | -2.794505 | -0.116857 |
| C    | 4.944809  | -0.510452 | -1.264847 | H    | -5.353147 | 1.619252  | 0.049275  |
| C    | 5.127845  | -0.631043 | 1.153438  | H    | -5.701057 | -2.666522 | -0.154769 |
| C    | -2.973425 | -0.638812 | 0.000257  | H    | 5.732445  | -0.691729 | 2.047699  |

**Table S8.** Cartesian coordinates of the optimized geometry of **BZ-3'** at  $S_{0,\min}$ . $E(\text{B3LYP}) = -1217.41195480$  Hartree

| Atom | x         | y         | z         | Atom | x         | y         | z         |
|------|-----------|-----------|-----------|------|-----------|-----------|-----------|
| C    | -0.005574 | 0.706683  | 1.349012  | C    | 0.604541  | 5.211535  | -3.355391 |
| C    | 0.000830  | -0.696063 | -1.020258 | C    | -0.604541 | -5.211535 | -3.355391 |
| C    | 0.000000  | 1.461418  | 0.168817  | C    | -0.435766 | -7.314203 | -1.973040 |
| C    | 0.005574  | -0.706683 | 1.349012  | H    | 0.009933  | -1.197591 | -1.980759 |
| C    | 0.000000  | -1.461418 | 0.168817  | H    | -0.009933 | 1.197591  | -1.980759 |
| C    | -0.000830 | 0.696063  | -1.020258 | H    | 0.061123  | -2.074118 | 2.945468  |
| N    | 0.006784  | -1.097430 | 2.679167  | H    | -0.061123 | 2.074118  | 2.945468  |
| C    | 0.000000  | 0.000000  | 3.521890  | H    | -0.024632 | -6.770104 | 0.479607  |
| N    | -0.006784 | 1.097430  | 2.679167  | H    | -0.355683 | -3.178570 | -1.916727 |
| O    | 0.000000  | 0.000000  | 4.757003  | H    | 0.267721  | -5.318860 | 2.424459  |
| C    | -0.015139 | -2.945714 | 0.190362  | H    | 0.024632  | 6.770104  | 0.479607  |
| C    | -0.028541 | -5.697426 | 0.339150  | H    | 0.355683  | 3.178570  | -1.916727 |
| C    | -0.201957 | -3.690595 | -0.978876 | H    | -0.267721 | 5.318860  | 2.424459  |
| N    | 0.150206  | -3.530607 | 1.403678  | H    | -0.488579 | 7.725577  | -1.550217 |
| C    | 0.136946  | -4.871844 | 1.441068  | H    | 1.278313  | 7.644225  | -1.351356 |
| C    | -0.205729 | -5.106306 | -0.939429 | H    | 0.564434  | 7.732366  | -2.970620 |
| C    | 0.015139  | 2.945714  | 0.190362  | H    | -0.228161 | 4.549895  | -3.622619 |
| C    | 0.028541  | 5.697426  | 0.339150  | H    | 0.689212  | 5.973926  | -4.128845 |
| N    | -0.150206 | 3.530607  | 1.403678  | H    | 1.530018  | 4.620515  | -3.353175 |
| C    | 0.201957  | 3.690595  | -0.978876 | H    | -0.689212 | -5.973926 | -4.128845 |
| C    | 0.205729  | 5.106306  | -0.939429 | H    | 0.228161  | -4.549895 | -3.622619 |
| C    | -0.136946 | 4.871844  | 1.441068  | H    | -1.530018 | -4.620515 | -3.353175 |
| N    | -0.373878 | -5.859016 | -2.068185 | H    | -1.278313 | -7.644225 | -1.351356 |
| N    | 0.373878  | 5.859016  | -2.068185 | H    | 0.488579  | -7.725577 | -1.550217 |
| C    | 0.435766  | 7.314203  | -1.973040 | H    | -0.564434 | -7.732366 | -2.970620 |

**Table S9.** Cartesian coordinates of the optimized geometry of **BZ-3'** at  $S_{1,N^*}$ . $E(\text{TD-HF/TD-DFT}) = -1217.28973664$  Hartree

| Atom | x         | y         | z         | Atom | x         | y         | z         |
|------|-----------|-----------|-----------|------|-----------|-----------|-----------|
| C    | 0.000340  | 0.711234  | 1.327626  | C    | -0.161673 | 5.328796  | -3.363439 |
| C    | -0.000783 | -0.710998 | -1.018985 | C    | 0.161673  | -5.328796 | -3.363439 |
| C    | 0.000000  | 1.512362  | 0.136839  | C    | 0.209509  | -7.381900 | -1.931151 |
| C    | -0.000340 | -0.711234 | 1.327626  | H    | -0.003396 | -1.185786 | -1.993755 |
| C    | 0.000000  | -1.512362 | 0.136839  | H    | 0.003396  | 1.185786  | -1.993755 |
| C    | 0.000783  | 0.710998  | -1.018985 | H    | -0.003339 | -2.100653 | 2.864114  |
| N    | -0.000928 | -1.103472 | 2.632974  | H    | 0.003339  | 2.100653  | 2.864114  |
| C    | 0.000000  | 0.000000  | 3.485148  | H    | 0.019952  | -6.793283 | 0.544619  |
| N    | 0.000928  | 1.103472  | 2.632974  | H    | 0.039275  | -3.258367 | -1.962404 |
| O    | 0.000000  | 0.000000  | 4.712897  | H    | -0.002807 | -5.301663 | 2.481762  |
| C    | 0.001007  | -2.960996 | 0.176692  | H    | -0.019952 | 6.793283  | 0.544619  |
| C    | 0.008819  | -5.724313 | 0.382352  | H    | -0.039275 | 3.258367  | -1.962404 |
| C    | 0.017532  | -3.748503 | -1.000194 | H    | 0.002807  | 5.301663  | 2.481762  |
| N    | -0.008971 | -3.535959 | 1.425381  | H    | -1.199247 | 7.618758  | -1.514623 |
| C    | -0.001962 | -4.871816 | 1.481261  | H    | 0.552440  | 7.842981  | -1.294641 |
| C    | 0.007819  | -5.153231 | -0.925133 | H    | -0.133684 | 7.837192  | -2.918664 |
| C    | -0.001007 | 2.960996  | 0.176692  | H    | -1.137986 | 4.831773  | -3.465876 |
| C    | -0.008819 | 5.724313  | 0.382352  | H    | -0.083017 | 6.097423  | -4.132262 |
| N    | 0.008971  | 3.535959  | 1.425381  | H    | 0.622376  | 4.587437  | -3.551949 |
| C    | -0.017532 | 3.748503  | -1.000194 | H    | 0.083017  | -6.097423 | -4.132262 |
| C    | -0.007819 | 5.153231  | -0.925133 | H    | 1.137986  | -4.831773 | -3.465876 |
| C    | 0.001962  | 4.871816  | 1.481261  | H    | -0.622376 | -4.587437 | -3.551949 |
| N    | -0.008649 | -5.943564 | -2.052434 | H    | -0.552440 | -7.842981 | -1.294641 |
| N    | 0.008649  | 5.943564  | -2.052434 | H    | 1.199247  | -7.618758 | -1.514623 |
| C    | -0.209509 | 7.381900  | -1.931151 | H    | 0.133684  | -7.837192 | -2.918664 |

**Table S10.** Cartesian coordinates of the optimized geometry of **BZ-3'** at  $S_{1,TS1}$ . $E(\text{TD-HF/TD-DFT}) = -1217.28423438$  Hartree

| Atom | x         | y         | z         | Atom | x         | y         | z         |
|------|-----------|-----------|-----------|------|-----------|-----------|-----------|
| C    | -0.698048 | 1.212525  | 0.003272  | C    | -5.469073 | -3.324471 | -0.054523 |
| C    | 0.774956  | -1.072861 | -0.028011 | C    | 5.455995  | -3.283644 | 0.085085  |
| C    | -1.465037 | -0.003451 | 0.003267  | C    | 7.470355  | -1.792710 | 0.107265  |
| C    | 0.713427  | 1.280895  | -0.010732 | H    | 1.291771  | -2.026157 | -0.042917 |
| C    | 1.538587  | 0.114580  | -0.025583 | H    | -1.090314 | -2.130085 | -0.016733 |
| C    | -0.646808 | -1.140007 | -0.013692 | H    | 1.971122  | 2.949010  | -0.014859 |
| N    | 1.009747  | 2.617987  | -0.004885 | H    | -2.399694 | 2.322637  | 0.029497  |
| C    | -0.165178 | 3.380208  | 0.012085  | H    | 6.807855  | 0.665615  | -0.049293 |
| N    | -1.217266 | 2.462169  | 0.017118  | H    | 3.346323  | -1.939800 | -0.012963 |
| O    | -0.239551 | 4.609925  | 0.020781  | H    | 5.260817  | 2.557940  | -0.050246 |
| C    | 2.990961  | 0.188801  | -0.037084 | H    | -6.722657 | 0.658809  | 0.049988  |
| C    | 5.743803  | 0.472484  | -0.051909 | H    | -3.314717 | -2.038515 | -0.003078 |
| C    | 3.808335  | -0.963776 | -0.033304 | H    | -5.130415 | 2.523464  | 0.051778  |
| N    | 3.525024  | 1.450799  | -0.045973 | H    | -7.833751 | -1.152225 | 0.749672  |
| C    | 4.860021  | 1.545405  | -0.050343 | H    | -7.717308 | -1.302783 | -1.020092 |
| C    | 5.211882  | -0.849698 | -0.053648 | H    | -7.946952 | -2.741724 | -0.008968 |
| C    | -2.905510 | 0.073170  | 0.019551  | H    | -4.767801 | -3.537714 | 0.760609  |
| C    | -5.663451 | 0.444486  | 0.046401  | H    | -6.285445 | -4.043126 | 0.009765  |
| N    | -3.434844 | 1.356043  | 0.034970  | H    | -4.945560 | -3.478042 | -1.008977 |
| C    | -3.759499 | -1.053730 | 0.016844  | H    | 6.247057  | -4.028934 | 0.003399  |
| C    | -5.157029 | -0.898220 | 0.039717  | H    | 4.719853  | -3.491361 | -0.699215 |
| C    | -4.765868 | 1.499223  | 0.045432  | H    | 4.963297  | -3.404496 | 1.061255  |
| N    | 6.031804  | -1.954259 | -0.079531 | H    | 7.898113  | -1.149369 | -0.668601 |
| N    | -6.007220 | -1.974200 | 0.059118  | H    | 7.950799  | -2.768005 | 0.029696  |
| C    | -7.448223 | -1.774581 | -0.065163 | H    | 7.715710  | -1.362081 | 1.088750  |

**Table S11.** Cartesian coordinates of the optimized geometry of **BZ-3'** at  $S_{1,T^*}$ . $E(\text{TD-HF/TD-DFT}) = -1217.30540166$  Hartree

| Atom | x         | y         | z         | Atom | x         | y         | z         |
|------|-----------|-----------|-----------|------|-----------|-----------|-----------|
| C    | 0.702079  | 1.398831  | -0.008587 | C    | 5.253822  | -3.388955 | 0.008539  |
| C    | -0.730065 | -0.976202 | -0.118758 | C    | -5.281793 | -3.374862 | 0.110251  |
| C    | 1.473512  | 0.182408  | -0.053430 | C    | -7.366545 | -1.970450 | 0.125721  |
| C    | -0.727094 | 1.374251  | -0.017209 | H    | -1.208404 | -1.947432 | -0.173325 |
| C    | -1.512619 | 0.180696  | -0.063827 | H    | 1.169403  | -1.947325 | -0.168799 |
| C    | 0.691037  | -0.976027 | -0.115431 | H    | -2.083319 | 2.956892  | 0.025195  |
| N    | -1.106108 | 2.679855  | 0.034017  | H    | 3.011007  | 2.238455  | 0.001734  |
| C    | 0.042872  | 3.493404  | 0.069122  | H    | -6.809750 | 0.510927  | -0.023275 |
| N    | 1.158838  | 2.678615  | 0.044782  | H    | -3.237063 | -1.936283 | 0.004287  |
| O    | 0.012653  | 4.733809  | 0.115022  | H    | -5.346126 | 2.468243  | -0.059407 |
| C    | -2.980253 | 0.201340  | -0.055102 | H    | 6.809830  | 0.491541  | 0.014945  |
| C    | -5.738140 | 0.364546  | -0.036423 | H    | 3.215990  | -1.952150 | -0.038736 |
| C    | -3.741104 | -0.981729 | -0.026419 | H    | 5.355618  | 2.474018  | 0.028116  |
| N    | -3.564296 | 1.433274  | -0.067561 | H    | 7.821807  | -1.356473 | -0.575434 |
| C    | -4.903899 | 1.473593  | -0.055477 | H    | 7.561817  | -1.613367 | 1.167919  |
| C    | -5.151715 | -0.931795 | -0.028868 | H    | 7.765360  | -2.994017 | 0.071927  |
| C    | 2.922267  | 0.166784  | -0.041021 | H    | 4.529603  | -3.520472 | -0.802925 |
| C    | 5.738154  | 0.361686  | -0.007977 | H    | 6.010224  | -4.166965 | -0.089600 |
| N    | 3.591036  | 1.393556  | -0.020190 | H    | 4.730354  | -3.528964 | 0.966029  |
| C    | 3.718575  | -0.997142 | -0.041865 | H    | -6.044477 | -4.151466 | 0.059872  |
| C    | 5.120296  | -0.948173 | -0.041099 | H    | -4.746952 | -3.476053 | 1.065406  |
| C    | 4.942621  | 1.472326  | 0.001676  | H    | -4.569672 | -3.551518 | -0.703817 |
| N    | -5.918106 | -2.069528 | -0.024450 | H    | -7.808708 | -1.382847 | -0.686343 |
| N    | 5.894292  | -2.082124 | -0.078053 | H    | -7.650646 | -1.509310 | 1.081877  |
| C    | 7.333208  | -1.998058 | 0.164296  | H    | -7.798014 | -2.970263 | 0.085681  |

**Table S12.** Cartesian coordinates of the optimized geometry of **BZ-3'** at  $S_{1,TS2}$ . $E(\text{TD-HF/TD-DFT}) = -1217.29106113$  Hartree

| Atom | x         | y         | z         | Atom | x         | y         | z         |
|------|-----------|-----------|-----------|------|-----------|-----------|-----------|
| C    | 0.700541  | -1.306979 | -0.008886 | C    | 5.460632  | 3.276792  | 0.028376  |
| C    | -0.663197 | 1.146557  | -0.027033 | C    | -5.499134 | 3.303218  | -0.012463 |
| C    | 1.501172  | -0.113174 | -0.024272 | C    | -7.472982 | 1.732194  | 0.014055  |
| C    | -0.720246 | -1.216885 | -0.002440 | H    | -1.112918 | 2.133996  | -0.035791 |
| C    | -1.463683 | 0.003934  | -0.010172 | H    | 1.279161  | 2.031221  | -0.050499 |
| C    | 0.757722  | 1.080428  | -0.034524 | H    | -2.480459 | -2.251280 | 0.016963  |
| N    | -1.235448 | -2.462992 | 0.012104  | H    | 2.923543  | -2.225604 | -0.023130 |
| C    | -0.125922 | -3.341824 | 0.014213  | H    | -6.723595 | -0.689896 | 0.029651  |
| N    | 1.065397  | -2.616844 | 0.001381  | H    | -3.335131 | 2.033092  | -0.015769 |
| O    | -0.223025 | -4.584174 | 0.026155  | H    | -5.111026 | -2.541777 | 0.035605  |
| C    | -2.917816 | -0.065744 | -0.000531 | H    | 6.811366  | -0.678777 | -0.019677 |
| C    | -5.665992 | -0.467120 | 0.020808  | H    | 3.347088  | 1.948053  | -0.016660 |
| C    | -3.771993 | 1.044886  | -0.004660 | H    | 5.256410  | -2.583718 | -0.017242 |
| N    | -3.432934 | -1.342586 | 0.014094  | H    | 7.700349  | 1.355496  | 1.118347  |
| C    | -4.764744 | -1.512387 | 0.024235  | H    | 7.906258  | 1.129106  | -0.636398 |
| C    | -5.174818 | 0.877294  | 0.005962  | H    | 7.948483  | 2.751114  | 0.051646  |
| C    | 2.948782  | -0.151271 | -0.030522 | H    | 4.946283  | 3.432627  | 0.988144  |
| C    | 5.747574  | -0.493266 | -0.029639 | H    | 6.257492  | 4.014329  | -0.060880 |
| N    | 3.549996  | -1.410748 | -0.031627 | H    | 4.743629  | 3.457138  | -0.780348 |
| C    | 3.801218  | 0.969006  | -0.029119 | H    | -6.328274 | 4.009291  | -0.013348 |
| C    | 5.199596  | 0.846672  | -0.041966 | H    | -4.892511 | 3.486765  | -0.908122 |
| C    | 4.896120  | -1.561528 | -0.026045 | H    | -4.881300 | 3.502057  | 0.872220  |
| N    | -6.027284 | 1.942593  | 0.002473  | H    | -7.804206 | 1.172940  | -0.869326 |
| N    | 6.030508  | 1.938758  | -0.073932 | H    | -7.973209 | 2.699623  | 0.009023  |
| C    | 7.468398  | 1.776192  | 0.130210  | H    | -7.792236 | 1.188356  | 0.911359  |

**Table S13.** Cartesian coordinates of the optimized geometry of **BZ-3'** at  $S_{1,TT^*}$ . $E(\text{TD-HF/TD-DFT}) = -1217.30174925$  Hartree

| Atom | x        | y         | z         | Atom | x         | y         | z         |
|------|----------|-----------|-----------|------|-----------|-----------|-----------|
| C    | 0.000000 | 0.719900  | 1.368709  | C    | 0.000000  | 5.341930  | -3.349439 |
| C    | 0.000000 | -0.706907 | -1.022566 | C    | 0.000000  | -5.341930 | -3.349439 |
| C    | 0.000000 | 1.480567  | 0.148297  | C    | 0.000000  | -7.401416 | -1.893686 |
| C    | 0.000000 | -0.719900 | 1.368709  | H    | 0.000000  | -1.191636 | -1.992602 |
| C    | 0.000000 | -1.480567 | 0.148297  | H    | 0.000000  | 1.191636  | -1.992602 |
| C    | 0.000000 | 0.706907  | -1.022566 | H    | 0.000000  | -2.936364 | 2.207812  |
| N    | 0.000000 | -1.164165 | 2.645048  | H    | 0.000000  | 2.936364  | 2.207812  |
| C    | 0.000000 | 0.000000  | 3.429499  | H    | 0.000000  | -6.799386 | 0.567160  |
| N    | 0.000000 | 1.164165  | 2.645048  | H    | 0.000000  | -3.265483 | -1.965876 |
| O    | 0.000000 | 0.000000  | 4.681929  | H    | 0.000000  | -5.289887 | 2.512725  |
| C    | 0.000000 | -2.929034 | 0.143526  | H    | 0.000000  | 6.799386  | 0.567160  |
| C    | 0.000000 | -5.730986 | 0.409396  | H    | 0.000000  | 3.265483  | -1.965876 |
| C    | 0.000000 | -3.745238 | -0.999312 | H    | 0.000000  | 5.289887  | 2.512725  |
| N    | 0.000000 | -3.558159 | 1.378965  | H    | -0.890778 | 7.758630  | -1.363387 |
| C    | 0.000000 | -4.905403 | 1.499531  | H    | 0.890778  | 7.758630  | -1.363387 |
| C    | 0.000000 | -5.150832 | -0.911330 | H    | 0.000000  | 7.843596  | -2.888890 |
| C    | 0.000000 | 2.929034  | 0.143526  | H    | -0.890276 | 4.719333  | -3.504614 |
| C    | 0.000000 | 5.730986  | 0.409396  | H    | 0.000000  | 6.129448  | -4.101451 |
| N    | 0.000000 | 3.558159  | 1.378965  | H    | 0.890276  | 4.719333  | -3.504614 |
| C    | 0.000000 | 3.745238  | -0.999312 | H    | 0.000000  | -6.129448 | -4.101451 |
| C    | 0.000000 | 5.150832  | -0.911330 | H    | 0.890276  | -4.719333 | -3.504614 |
| C    | 0.000000 | 4.905403  | 1.499531  | H    | -0.890276 | -4.719333 | -3.504614 |
| N    | 0.000000 | -5.945258 | -2.020848 | H    | -0.890778 | -7.758630 | -1.363387 |
| N    | 0.000000 | 5.945258  | -2.020848 | H    | 0.890778  | -7.758630 | -1.363387 |
| C    | 0.000000 | 7.401416  | -1.893686 | H    | 0.000000  | -7.843596 | -2.888890 |

**Table S14.** Cartesian coordinates of the optimized geometry of the local minimum ( $\tau = 31.5^\circ$ ) of protonated **BZ-3'** in  $S_1$  state.

$E(\text{TD-HF/TD-DFT}) = -1217.74795827$  Hartree

| Atom | x         | y         | z         | Atom | x         | y         | z         |
|------|-----------|-----------|-----------|------|-----------|-----------|-----------|
| C    | 1.465815  | 0.079011  | 0.318884  | C    | 4.914890  | 1.241428  | 1.091283  |
| C    | -1.511094 | 0.100555  | 0.084832  | C    | 5.114771  | -0.956518 | 0.054202  |
| C    | 0.733834  | 1.258656  | 0.069795  | H    | 6.775652  | 0.374431  | 0.678743  |
| C    | 0.651527  | -1.060988 | 0.420626  | H    | 3.209280  | -1.824184 | -0.489375 |
| C    | -0.765120 | -1.053619 | 0.296798  | H    | 5.322327  | 2.133915  | 1.550789  |
| C    | -0.697681 | 1.273043  | -0.033317 | O    | 0.068167  | 4.571485  | -0.656978 |
| H    | 1.124764  | -2.014660 | 0.628962  | N    | -6.006198 | -1.942853 | 0.121097  |
| H    | -1.263076 | -2.010322 | 0.396829  | N    | 5.912743  | -1.998558 | -0.372376 |
| N    | -1.064646 | 2.542151  | -0.306683 | C    | -7.455015 | -1.790231 | 0.006575  |
| C    | 0.054729  | 3.379874  | -0.407126 | H    | -7.927451 | -2.761484 | 0.145383  |
| N    | 1.146279  | 2.543973  | -0.164667 | H    | -7.740618 | -1.409669 | -0.981540 |
| H    | -2.060598 | 2.766033  | -0.426828 | H    | -7.846909 | -1.108116 | 0.770625  |
| H    | 2.105256  | 2.862151  | -0.224779 | C    | -5.438319 | -3.262984 | 0.380009  |
| C    | -2.977618 | 0.173847  | -0.027605 | H    | -4.755818 | -3.568537 | -0.422596 |
| C    | -5.704758 | 0.443323  | -0.261501 | H    | -4.890988 | -3.284652 | 1.330711  |
| N    | -3.489859 | 1.411024  | -0.271562 | H    | -6.243723 | -3.993771 | 0.435473  |
| C    | -3.782813 | -0.961476 | 0.109721  | C    | 5.285853  | -3.135600 | -1.035479 |
| C    | -5.191105 | -0.858114 | -0.006015 | H    | 6.038364  | -3.902486 | -1.218735 |
| C    | -4.822329 | 1.507317  | -0.380150 | H    | 4.512746  | -3.572878 | -0.396133 |
| H    | -6.765146 | 0.628641  | -0.366656 | H    | 4.826864  | -2.857945 | -1.997110 |
| H    | -3.326413 | -1.919822 | 0.307518  | C    | 7.327404  | -1.756649 | -0.656178 |
| H    | -5.211453 | 2.503554  | -0.575768 | H    | 7.469964  | -1.012706 | -1.453016 |
| C    | 2.911176  | 0.049800  | 0.457238  | H    | 7.787670  | -2.692895 | -0.971522 |
| C    | 5.704569  | 0.246239  | 0.616782  | H    | 7.856756  | -1.417664 | 0.238281  |
| C    | 3.713449  | -0.994205 | -0.013675 | H    | 3.026938  | 1.720951  | 1.705854  |
| N    | 3.535579  | 1.194831  | 1.005124  |      |           |           |           |



**Table S15.** Cartesian coordinates of the optimized geometry of the global minimum ( $\tau = 156.4^\circ$ ) of protonated **BZ-3'** in  $S_1$  state.

$E(\text{TD-HF/TD-DFT}) = -1217.75602423$  Hartree

| Atom | x         | y         | z         | Atom | x         | y         | z         |
|------|-----------|-----------|-----------|------|-----------|-----------|-----------|
| C    | -1.317467 | -0.710163 | -0.160881 | C    | -4.338771 | -2.766524 | -0.723301 |
| C    | 1.545764  | -0.043983 | 0.009557  | C    | -5.114734 | -0.634163 | 0.127047  |
| C    | -0.829434 | 0.623991  | -0.212240 | H    | -6.384226 | -2.369714 | -0.423848 |
| C    | -0.284341 | -1.698537 | -0.038202 | H    | -3.521859 | 0.723674  | 0.633174  |
| C    | 1.058183  | -1.380858 | 0.049253  | H    | -4.481495 | -3.775193 | -1.091470 |
| C    | 0.530979  | 0.938194  | -0.123650 | O    | -0.864400 | 4.087543  | -0.658143 |
| H    | -0.559127 | -2.743749 | 0.062513  | N    | 6.330409  | -1.246894 | 0.184778  |
| H    | 1.752383  | -2.202482 | 0.185553  | N    | -6.139160 | 0.169857  | 0.532308  |
| N    | 0.633304  | 2.317343  | -0.266473 | C    | 7.719813  | -0.919421 | -0.111746 |
| C    | -0.603639 | 2.893266  | -0.470984 | H    | 8.176758  | -1.778904 | -0.604571 |
| N    | -1.496973 | 1.836715  | -0.414687 | H    | 8.255682  | -0.733240 | 0.826887  |
| H    | 1.513914  | 2.811324  | -0.216898 | H    | 7.787442  | -0.049734 | -0.759990 |
| H    | -2.464174 | 1.951832  | -0.673669 | C    | 6.049906  | -2.639164 | 0.512289  |
| C    | 2.961276  | 0.293623  | 0.076886  | H    | 5.278443  | -2.704469 | 1.278081  |
| C    | 5.646268  | 1.083729  | 0.213112  | H    | 5.718497  | -3.166188 | -0.391221 |
| N    | 3.296248  | 1.613161  | 0.121570  | H    | 6.967489  | -3.105029 | 0.869251  |
| C    | 3.978437  | -0.688516 | 0.084130  | C    | -5.856883 | 1.516216  | 1.018883  |
| C    | 5.324457  | -0.294130 | 0.156713  | H    | -6.794497 | 2.021221  | 1.245469  |
| C    | 4.581719  | 1.975478  | 0.194721  | H    | -5.247168 | 1.496011  | 1.931625  |
| H    | 6.660337  | 1.444276  | 0.312460  | H    | -5.327495 | 2.105102  | 0.260177  |
| H    | 3.725201  | -1.732666 | -0.019836 | C    | -7.516765 | -0.321868 | 0.545420  |
| H    | 4.773499  | 3.043646  | 0.243392  | H    | -7.857025 | -0.589544 | -0.461362 |
| C    | -2.704935 | -1.056130 | -0.223155 | H    | -8.168760 | 0.464667  | 0.922055  |
| C    | -5.382473 | -1.973292 | -0.354664 | H    | -7.626179 | -1.195529 | 1.198575  |
| C    | -3.773942 | -0.222367 | 0.179830  | H    | -2.327558 | -2.933898 | -1.039629 |
| N    | -3.048883 | -2.337902 | -0.659736 |      |           |           |           |
